# Supplementary material
Source: PubMed Central journal article supplement (PMC4587450)
Supplement: supp_pp.15.00584_00584suppdata.pdf [file supp_pp.15.00584_00584suppdata.pdf]

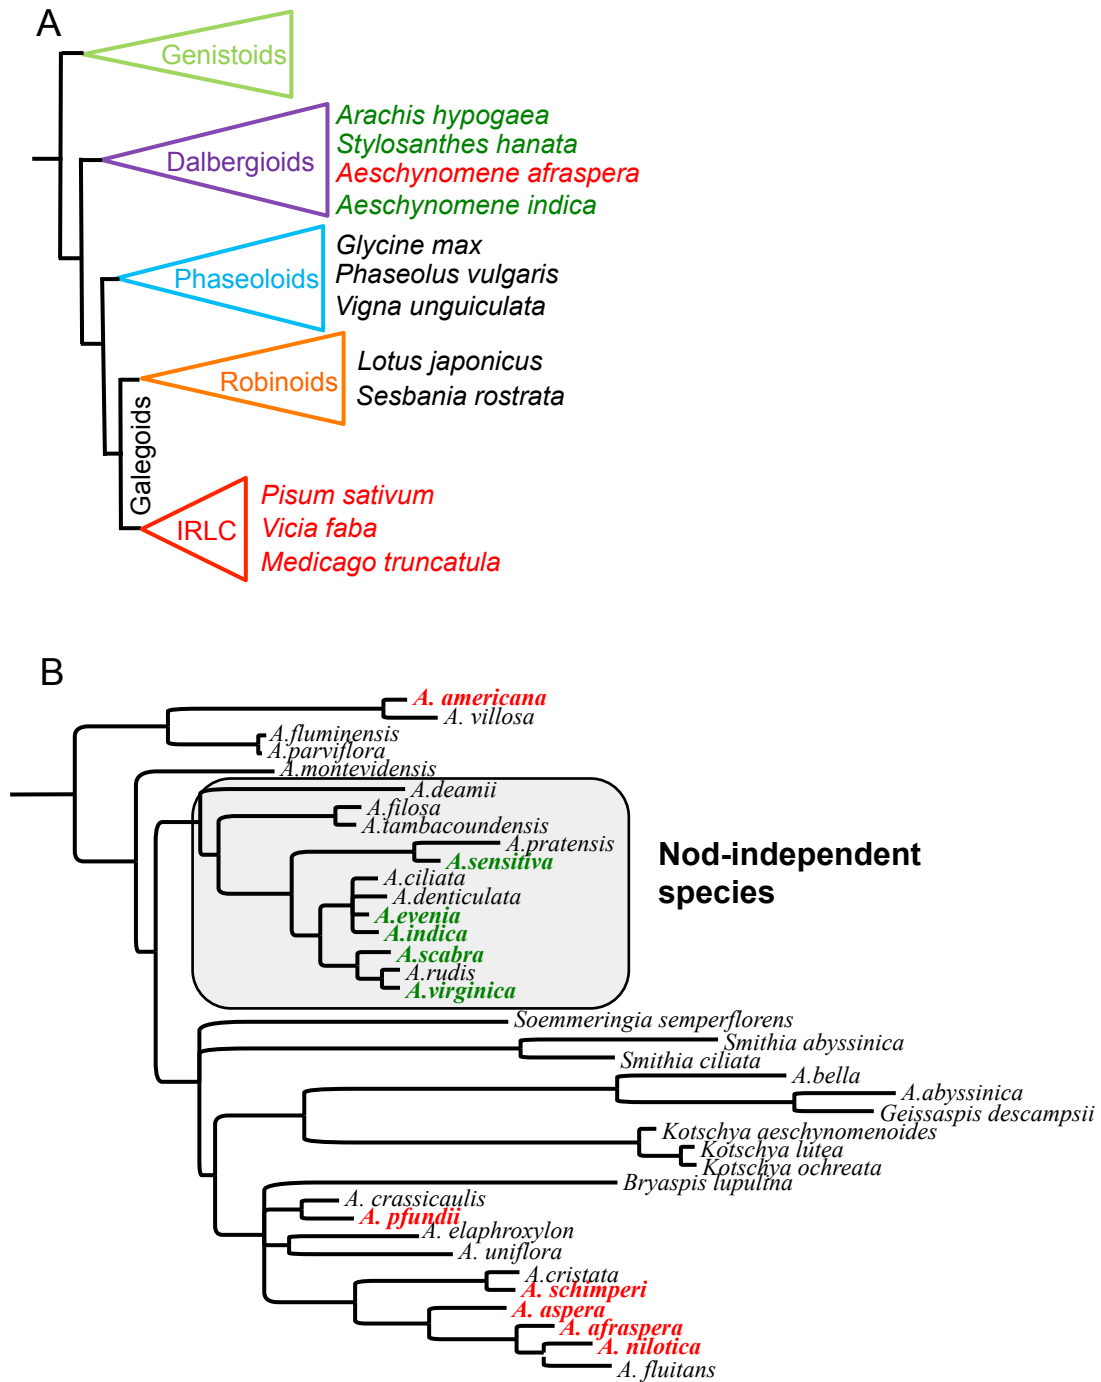

**Supplemental Figure S1:** Distribution of bacteroid morphotypes among papilionoid legumes. (A) Simplified phylogenetic tree with triangles representing the major legume clades. Notable species for which bacteroid morphotype has been characterized are indicated. In red, E-morphotype; green, S-morphotype and black, U-morphotype. Figure adapted from Oono et al. (2010). (B) Phylogeny of the genus *Aeschynomene* based on the ITS + *trnL*. Figure adapted from Chaintreuil et al. (2013). Species forming E-morphotype bacteroids are indicated in red, species forming S-morphotype bacteroids in green. The other species have not been analyzed.

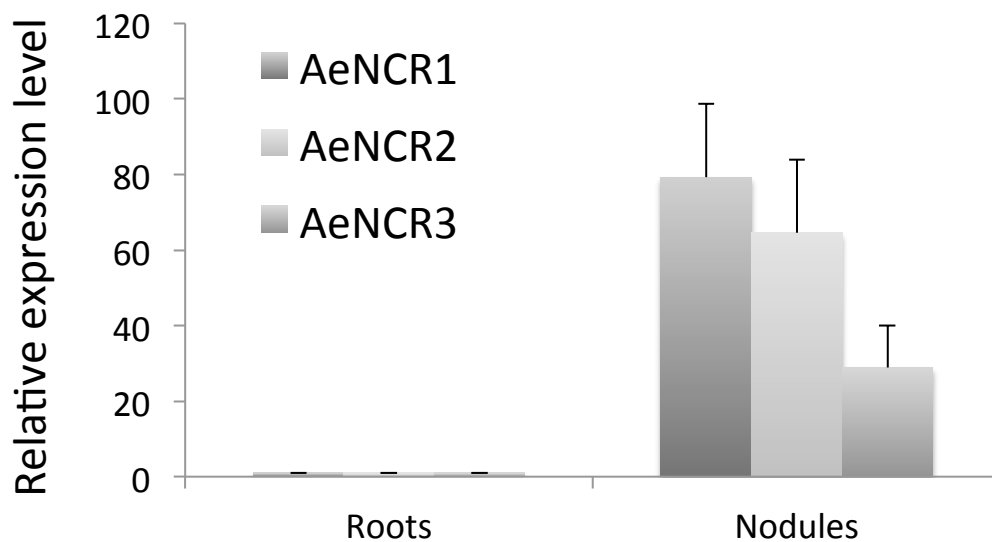

**Supplemental Figure S2.** Nodule specific expression of NCR genes in *A. evenia*. RNA was extracted from *A. evenia* spp. serrulata roots or mature nodules 14 days after inoculation with the Bradyrhizobium strain ORS285. Expression levels were calculated relative to EF1 $\alpha$ . Error bars indicate standard errors of the means of 3 biological replicates.

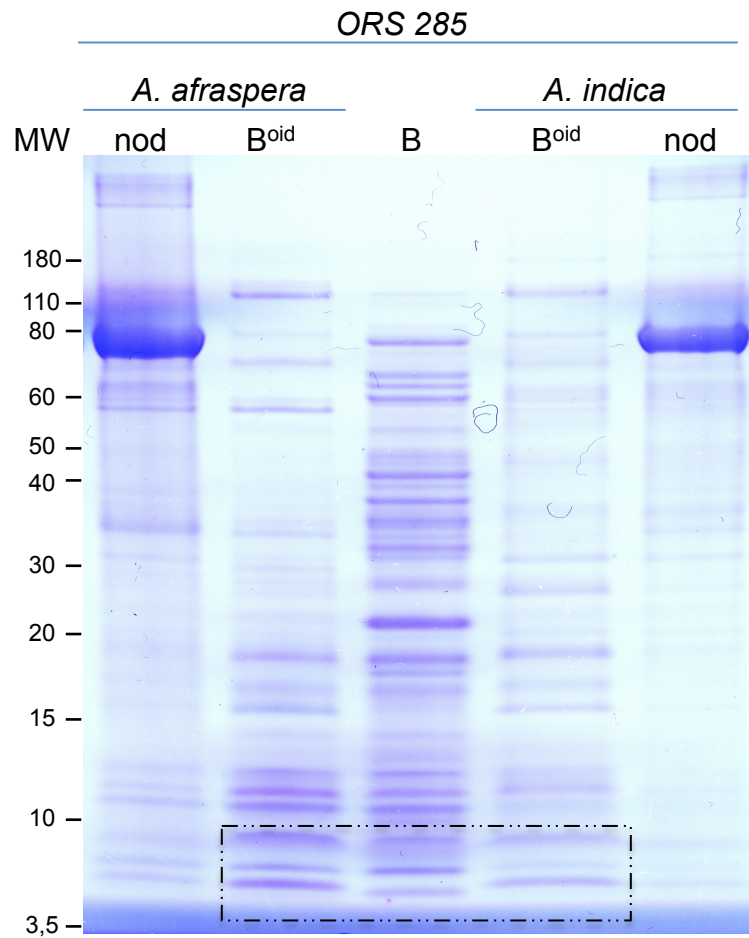

**Supplemental Figure S3.** NCR peptides colocalize with bacteroids in *A. afraspera* and *A. indica* nodules. Tricine-SDS-PAGE analysis and Coomassie blue staining of total protein extracts of nodules (nod), bacteroids (B<sup>oid</sup>), and cultured *Bradyrhizobium* strain ORS285 cells (B) reveal the specific presence of low molecular-weight peptides in nodules and bacteroids. The rectangle in the dashed line corresponds to the region of the gel analysed by LC-MS/MS.

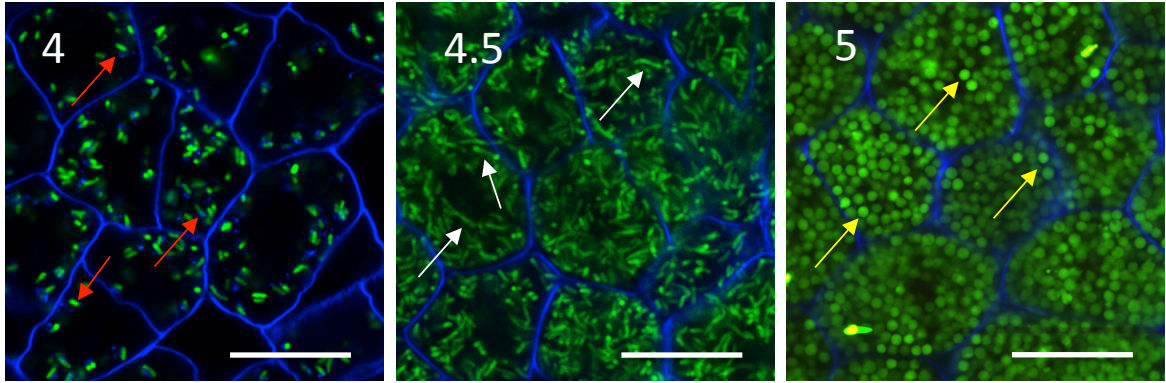

**Supplemental Figure S4.** Change in the bacterial cell shape during the symbiotic interaction between *Bradyrhizobium* strain ORS285 and *Aeschynomene indica*. *A. indica* nodules were elicited by a *Bradyrhizobium* ORS285 strain expressing GFP to easily visualize the bacteroids. Nodules were harvested at 4, 4.5 and 5 dpi, then sectioned and analysed by confocal microscopy. Red and yellow arrows show respectively early (U-morphotype) and final (S-morphotype) shape of bacteroids while white arrows point the transitory elongated shape of the bacteroids. Bars represent 10 µm.

**A**

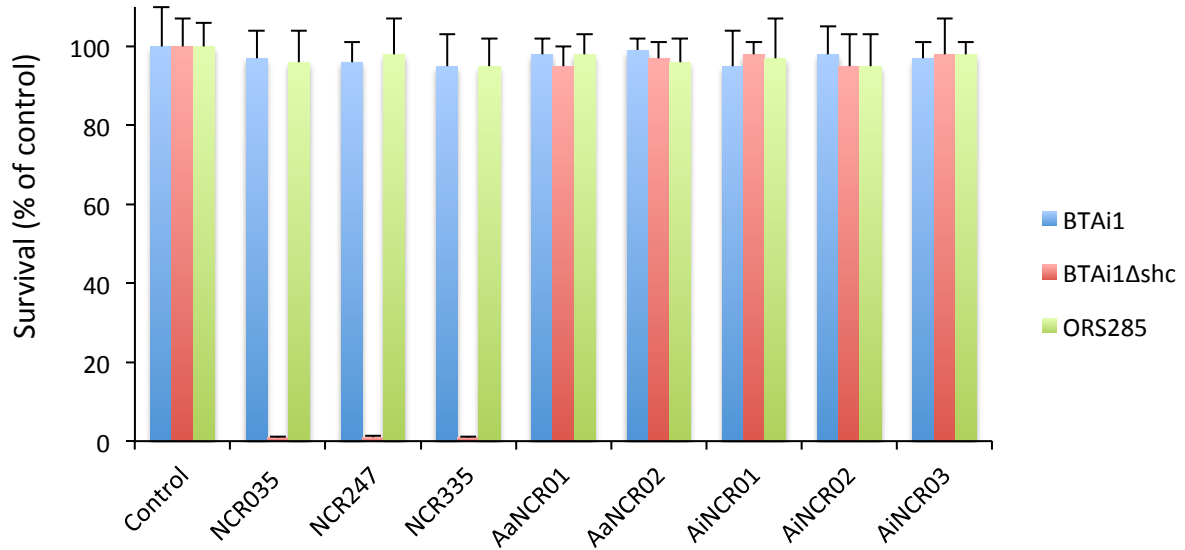

**B**

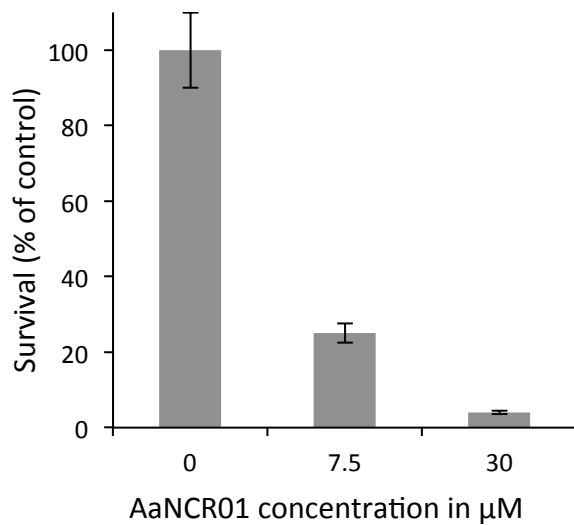

**C**

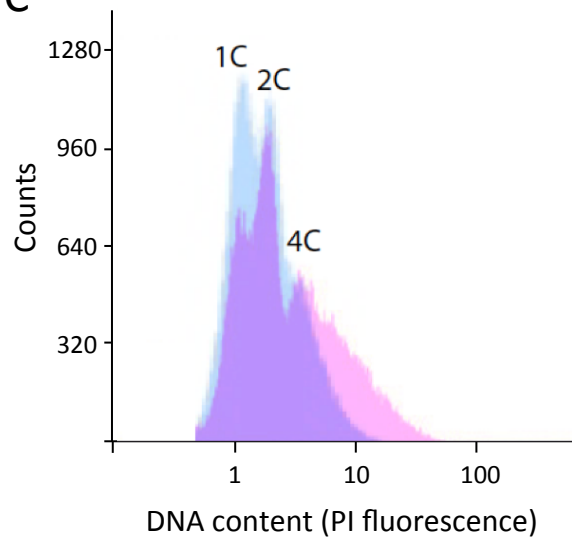

**Supplemental Fig. S5.** *In vitro* effect of synthetic *Aeschynomene* and *Medicago* NCR peptides.

(A) Effect on the viability of BTai1, hopanoid BTai1 mutant (BTai1Δshc) and ORS285 strains. The viability test was done according to Van de Velde *et al.* (2010) with 10  $\mu\text{M}$  of each NCR. Control: cells treated with H<sub>2</sub>O or NH<sub>4</sub>OH 5% used to solubilize *Aeschynomene* anionic NCRs.

(B) and (C) Effect of AaNCR01 on *S. meliloti* bacteria. (B) Effect on the viability. The viability test was done according to Guefrachi *et al.* (2015) with 7.5 and 30  $\mu\text{M}$  of AaNCR01. (C) Flow cytometry analysis of DNA content in *S. meliloti*. Blue (no treated), pink (treated with 10  $\mu\text{M}$  of AaNCR01 during 4 h). Error bars in B and C are standard deviations.

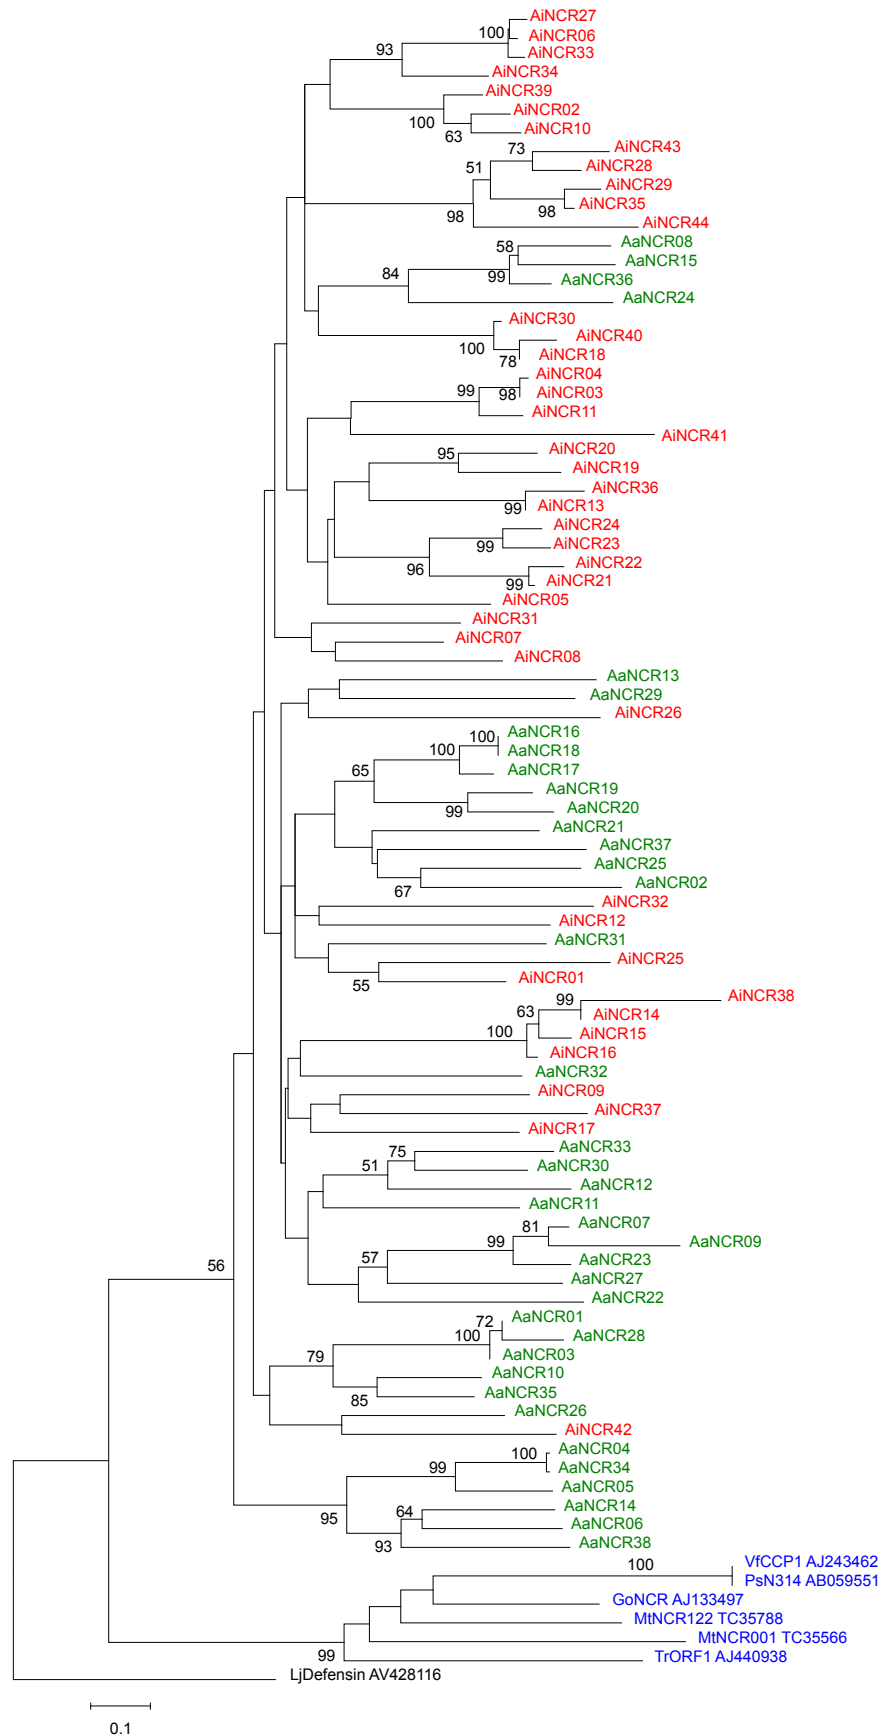

**Supplemental Figure S6.** Neighbor joining phylogeny of NCR protein sequences. The amino acid sequences of NCR genes were aligned using Muscle3.6. The evolutionary distances were computed using the Poisson correction method, and a tree was inferred from the distance matrix by Neighbor Joining using MEGA5. All ambiguous positions were removed for each sequence pair. There were a total of 210 positions in the final dataset. Percent of bootstrap replicates (1000 replicates) are indicated at each tree node (only if >50%). NCRs from *A. afraspera* and *A. indica* are in green and red respectively and those from different IRLC legumes are in blue (The accession numbers are indicated). A defensin from *Lotus*, a non-IRCL legume was used for tree rooting.

**Supplemental Table S1:** *Aeschynomene afraspera* and *Aeschynomene indica* root and nodule expressed sequenced tags (ESTs) and cluster collection statistics.

|                             | <i>A. afraspera</i> |            | <i>A. indica</i> |            |
|-----------------------------|---------------------|------------|------------------|------------|
|                             | Root                | Nodule     | Root             | Nodule     |
| Number of cDNA sequenced    | 9492                | 9582       | 9621             | 9847       |
| <u>EST summary:</u>         |                     |            |                  |            |
| Number of high-quality ESTs | 9017 (95%)          | 8688 (91%) | 9117 (95%)       | 8768 (89%) |
| Average EST length (bp)     | 551                 | 513        | 528              | 510        |
| EST size range (bp)         | 102-819             | 102-817    | 101-803          | 101-782    |
| Non valid sequences         | 475 (5%)            | 894 (9%)   | 504 (5%)         | 1079 (11%) |
| Small size                  | 360 (76%)           | 729 (82%)  | 387 (77%)        | 911 (84%)  |
| Low quality                 | 115 (24%)           | 165 (18%)  | 117 (23%)        | 168 (16%)  |
| <u>Cluster summary:</u>     |                     |            |                  |            |
| Number of clusters          | 923                 | 732        | 1006             | 812        |
| Number of singletons        | 4162                | 3493       | 4566             | 4164       |
| Number of contigs           | 1161                | 903        | 1268             | 1025       |
| Average contig length (bp)  | 750                 | 723        | 729              | 703        |
| Contig size range (bp)      | 220-1794            | 122-2267   | 146-1268         | 120-1025   |

**Supplemental Table S2.** Nodule- specific Cys-rich putative peptides from *Aeschynomene indica*, *A. afraspera* and *A. evenia*. The NCR were named with the initials of the plant species and numbered according to the read count level in the EST nodule libraries (for *A. indica* and *A. afraspera*) or arbitrarily for *A. evenia*. The NCR with a read count above 5 in the nodules are grey shaded. Signal peptides were determined using SignalP 4.0 (Petersen TN, Brunak S, von Heijne G, Nielsen H - 2011- SignalP 4.0: discriminating signal peptides from transmembrane regions. Nature Meth 8(10):785-786) and adjusted manually. Theoretical pI and MW were calculated for mature peptides from ExPASy web site (Gasteiger E, et al. -2005- Protein Identification and Analysis Tools on the ExPASy Server; In John M. Walker (ed): The Proteomics Protocols Handbook, Humana Press). For the *A. evenia* NCRs, the pI and MW were calculated for the mature peptide even if the signal peptide was truncated or contained stop codon (indicated in the table). The presence of a signature corresponding to NCR motif 1 (1) or motif 2 (2), as defined in figure 3, is indicated in the last column. The 1\* indicate a motif 1 where the spacing between Cyst 4 and 5 contains 5 amino acids instead of 4.

| Sequence            |              | Mature peptide (aa)                                                                                                         | Nbr of Cys | pI | Theoretical MW | Read count Root | Nodule | NCR motif |    |
|---------------------|--------------|-----------------------------------------------------------------------------------------------------------------------------|------------|----|----------------|-----------------|--------|-----------|----|
| <b>A. afraspera</b> |              |                                                                                                                             |            |    |                |                 |        |           |    |
| AaNCR01             | CL3contig5   | <b>MAKLNWANLFAIILLVTVMSMASHLHVGLRMIDSWIDPKCLDEMCSMSSCRNKHGGLAMGHCVGSICICPFDK</b>                                            | 46         | 6  | 6.87           | 5087.04         | 1      | 242       | 1  |
| AaNCR02             | CL13contig1  | <b>MAKLANFFTLVLLVAVISITSHHQVAESRLCNHRWFIEIRCNVNESFCNDKCSGRHGDRNTINAFVIGYCSYFDCPDGEDCSCIGF</b>                               | 59         | 10 | 5.44           | 6768.5          | 0      | 71        | 2  |
| AaNCR03             | CL3Contig3   | <b>MAKLNWANLFAIILLVTVMSMASHHHQVGLRMIDSWIDPKCLEMCSMSSCRNKHGGLAMGHCVGSICICPFDK</b>                                            | 44         | 6  | 7.79           | 4874.83         | 0      | 45        | 1  |
| AaNCR04             | CL16contig1  | <b>MARLTLINLLSLVLLITGILITSSDYTVAGYVICVWRDPNCGKGDPNYCAQDKCKNDYGEKAIPVCRYDVCFCGYECTFPNNGDDYN</b><br>GERNQNNRM                 | 66         | 8  | 4.57           | 7615.40         | 0      | 25        | 2  |
| AaNCR05             | CL16contig2  | <b>MAKLTINLLSLVLLVTGMLMTSSDYKVAAGYMCVVGWRDPNCGKGDPNYCAQDKCKNDHGEKATAFCRDDVCFVLWL</b>                                        | 46         | 6  | 4.89           | 5202.85         | 0      | 23        | no |
| AaNCR06             | CL31contig1  | <b>MARLTLINFLPLLLVTVGMWVKSHHYKAVGEYIDVCFDWDATNCEKGDNSFCVQCKEKNKHIEGAAQCRENRCFIFCAPNIPS</b><br>PISYDGGDDYNGEGINNDGI          | 77         | 8  | 4.08           | 8573.32         | 0      | 22        | 2  |
| AaNCR07             | CL50contig1  | <b>MTKLTSTNIFALILLFTAISMTSLHQVANSNCWHSWMDTNPCEPETCVQLCSDSYKVLIDAFENLHVCVEYECPDN</b>                                         | 47         | 8  | 4.01           | 5479.0          | 0      | 14        | 2  |
| AaNCR08             | CL64contig1  | <b>MTKLIILGNFFAIVLLMTVILIIKSHIEVAGEAGCEQSSDYLPIADYCEEGFDHWYDRNCPVTDFCKLECIKRGHRTGDGACNWIY</b><br>CYCRYLPNSTSEDALRP          | 75         | 8  | 4.60           | 8790.69         | 0      | 10        | 1  |
| AaNCR09             | CL67contig1  | <b>MTKLTSTNIFALILLFTAISMTSLHQVANSNCWHSWMDTNPCEPETCVQLCSDSYKVEASRWRPMLLVKDEAPATVRDSLLQESVTV</b><br>APNLWDFKIKRGPESGIN        | 75         | 4  | 4.94           | 8570.6          | 0      | 10        | no |
| AaNCR10             | CL3Contig2   | <b>MAKLNWAKFVALILLVTAMSMTHHHQVVGEMKDTWIDLRCFTDLPCTSDCRNKYGVFAVGRVGVLCCTEYELC</b>                                            | 47         | 7  | 4.46           | 5372.21         | 0      | 7         | 1  |
| AaNCR11             | CL132contig1 | <b>MARLTVVYLFSLLLVTAISITSHHQVVGFLCLDDVWDESACERGSDGCMQDKCNKHGYTAQGFQYDSCFCSYQCS</b>                                          | 49         | 8  | 4.08           | 5656.15         | 0      | 6         | 2  |
| AaNCR12             | CL746contig1 | <b>MSRLTSAYFFSIVLLVEAISKSHHQVAVANKLDDWFDHNKYCVEDDCVQCECKRQHNSTEGYCAYNCFPCYCEPDSPPMPPNSP</b><br>VSPDYDDSPNPPTWDK             | 72         | 8  | 4.14           | 8448.1          | 0      | 6         | 2  |
| AaNCR13             | CL127Contig1 | <b>MTKLIILATIFALILLMIAISMTSEVDGNMCRFRWYDLNCKDPEYRGCMMCECKSNYGDYAYGFCQYKPCSNYCGPD</b>                                        | 50         | 8  | 7.67           | 5959.77         | 0      | 6         | 2  |
| AaNCR14             | CL111Contig1 | <b>MARLTLNLFALVLLVTVGMWMTSEYKAVAGGIYTCSEVWDDPNCEKEDYTNCTQNCKRKYGMKATSHCRGDKCFICEFDLPLFS</b><br>PINYDGDYGNNEGDDYNSIGINNNNDGT | 85         | 8  | 4.22           | 9642.35         | 0      | 6         | 2  |
| AaNCR15             | CL211contig1 | <b>MAKLIILGNFFAIVLLMTVILIIKSHIEVAGEAGCKPSSDYIAGFMFWMNCPVTDFCNSECKRKHKPGDGECSGIYCHCRYLESEI</b><br>RRDEMMS                    | 66         | 7  | 5.19           | 7654.68         | 0      | 5         | 1  |
| AaNCR16             | CL220Contig1 | <b>MAKLSNLFALVLLVTAISMPSHHQVESKKTDEWYDIRCNLNEGYCRVDCLEVHGGGLAKGYCQGDYCFDYYCPGLLIV</b>                                       | 52         | 8  | 4.70           | 6009.86         | 0      | 4         | 2  |
| AaNCR17             | CL263Contig1 | <b>MAKLSNFFALVLLVTAIWMPSHHQVEGKECTDRWYDERCSLNEGYCRVDCLEVHGGGLAKGYCQGDYCFDYYCPGLLIV</b>                                      | 53         | 8  | 4.75           | 6219.02         | 0      | 4         | 1* |
| AaNCR18             | CL220Contig2 | <b>MAKLSNLFALVLLVTAIPMPSHHQVESKKTDE*YDIRCNLNEGYCRVDCLEVHGGGLAKGYCQGDYCFDYYCPGLLIV</b>                                       | 51         | 8  | ND             | ND              | 0      | 4         | 2  |
| AaNCR19             | CL266Contig1 | <b>MAKLANFFTLVLLVTAISMTMNQVVEGKICNEMWYDIRCNLSESDCRLDICIELYGGGPAKGYCVGDYCCCNVDCVGDYCSNYE</b><br>QEQVCGGPQ                    | 66         | 12 | 4.02           | 7420.27         | 0      | 4         | 2  |
| AaNCR20             | CL136Contig1 | <b>MAKLANFLTLVLLVTAISMTMNQVVEGKICNEMWYDIRCNLSESYCREDCIEKHGVLAKGYRGMGNKCCCLTV</b>                                            | 45         | 7  | 7.73           | 5279.24         | 0      | 4         | no |
| AaNCR21             | CL297Contig1 | <b>MAKLANFFTLVLLVTAISMTSHLQVEGWCKNKWLDIRCGLYESYCWEDCSKLHGETAIGFCEDIYCSYDSCRNIKN</b>                                         | 52         | 8  | 5.09           | 6258.06         | 0      | 4         | 2  |
| AaNCR22             | CL181Contig1 | <b>MTELTSKNHFALIIIVTAISMRSLLHQVARECIDTWIDRNCEYNYIEICKLDCKDYGGESSFAYCVDHHKCKCHYKCPQWPYFN</b>                                 | 55         | 8  | 5.82           | 6841.71         | 0      | 4         | 1* |
| AaNCR23             | CL50Contig2  | <b>MTKLTSTNIFALILLFTAISMTSLHQVANSNCWYSWMDKYCEDETQVQSCNDTYKVLIDAFENIHCFCYECPNKDK</b>                                         | 49         | 8  | 4.28           | 5918.59         | 0      | 4         | 2  |
| AaNCR24             | CL217Contig1 | <b>MTKLTLANIFAIVILVIMLIQSHDGVAGQDDYCEPNSDYLPQIANCWEDGLYSWFDLTCPMSNENCKLDCKRKVGTPTGDGVCL</b><br>IYCYCRY                      | 64         | 8  | 4.20           | 7493.43         | 0      | 4         | 1  |
| AaNCR25             | CL226Contig1 | <b>MAKLAKFLPIVLLVTAISITSHHQVAGKLCNHRWFDIRCNLVDYDNESFCNKDCSLHGDVAMFGFVLDYCSCHYVSPVTV</b><br>DEHCSNYEQNGLCVGV                 | 77         | 10 | 5.03           | 8817.89         | 0      | 4         | 1  |
| AaNCR26             | CL779Contig1 | <b>MVKLTLTNLFAVLLVTVGMLMRSDDVGEVTFDWDWNCRVDEINCMIDCQEKHGITAVGSCIAIICKVCFESNC</b>                                            | 48         | 7  | 4.28           | 5455.30         | 0      | 3         | 1  |
| AaNCR27             | CL416Contig1 | <b>MVKLTLTNFALVLLVTAISMGSHQVQASDLWNSWIIINCKEDCKKQCSSEYVPIIEAFAGSYCFCKYEET</b>                                               | 45         | 8  | 5.06           | 5267.11         | 0      | 3         | 2  |
| AaNCR28             | CL3Contig1   | <b>MSMASRHHQVGLRMIDSWIDPKCLDILGLIQSAYEMSCMSSCRNKHGGLAMGHCVGSICICPFDK</b>                                                    | 55         | 6  | 6.87           | 6046.19         | 0      | 2         | 1  |
| AaNCR29             | CL491Contig1 | <b>MTKLTLANFVLSLQITVIMWTSNGKAVAGEDCLCNWFDKNCRDGDSKECVKDCRDSHGNNMAHGSCAYDLVCSYSCPNSSPS</b><br>WDK                            | 56         | 9  | 4.74           | 6286.88         | 0      | 2         | 2  |
| AaNCR30             | CL820Contig1 | <b>MTNLDLTNFFAILLVTASMTSHHHQVVEVCLDEFDMNCREIDSTICFEDCKYMHGKTKGVCAFNHCTCMYEC</b>                                             | 46         | 8  | 4.82           | 5395.21         | 0      | 2         | 2  |
| AaNCR31             | CL414Contig1 | <b>MAKLNKTFFAVLLIIAISMTSHHQVAGDVCYEWADFLCLFGYSRCSRYCEFAHQGVGATIGYCEDGKCTCSFQC</b>                                           | 49         | 8  | 4.58           | 5587.25         | 0      | 2         | 2  |
| AaNCR32             | CL371Contig1 | <b>MAKLTNTNFVVLVSVISMTSDHHQVVGSKCPDEGVDNKYCSSEWVDMNCTTGSEDCSQECVNNYIGAEAGSCAGTKCCCRY</b><br>YCPGSLE                         | 62         | 10 | 4.05           | 6723.35         | 0      | 2         | 2  |
| AaNCR33             | CL310Contig1 | <b>MNTLTLANFFAVILSVTAISMTSYHHHQVVEECLDMFMNCEIEDSNKNVCEACKYMHAGDNNVGDGKVLVDHCYCKYEC</b>                                      | 49         | 8  | 4.27           | 5676.35         | 0      | 2         | 2  |



| Sequence         |              | Mature peptide (aa)                                                                                                                   | Nbr of Cys | pI | Theoretical MW | Read count Root | Nodule | NCR motif |    |
|------------------|--------------|---------------------------------------------------------------------------------------------------------------------------------------|------------|----|----------------|-----------------|--------|-----------|----|
| AaNCR34          | CL16Contig4  | <b>MARLTLINLLSLLITGILITSSDYTVAGY</b> YVIVVWRDPNCGKGDPNYCAQDCCKNGYGEKAIPVCRYDVCFCGYECTFPNNGDDYN<br>GERNQNNRM                           | 66         | 8  | 4.77           | 7557.36         | 0      | 2         | 2  |
| AaNCR35          | CL3Contig4   | <b>MAKLWAKFVALILLVTAAMLMTSYHHQVAGI</b> HTTDSWIDPSCFDEMFCMLDCRNKHGVFALGSCVGNICECTYELKS                                                 | 48         | 6  | 4.63           | 5422.18         | 0      | 1         | 1  |
| AaNCR36          | CL304Contig1 | <b>MTKLILGNFFAIVLLMTVILIIKSHIEVAGE</b> ASCEPSSDYLPQIAGFDSWYDINCPMSDFLCNMECKRKYGRGTGYGGCVGNCHCY                                        | 58         | 7  | 4.65           | 6676.44         | 0      | 1         | 1  |
| AaNCR37          | CL278Contig1 | <b>MAKLATFLHFFWSNIFALFLVTAISITHHQVAC</b> GKLCNHHKWFDRRCGYMDDSDCNKYCLDLHGDKLAGFCVYVYCSCHYICPG<br>DDVPVDEDCSCNYEQKTCVCGWSLGSCTNIVLPLVVG | 89         | 13 | 4.67           | 10038.41        | 0      | 1         | 2  |
| AaNCR38          | CL77Contig1  | <b>MARLTLINFLPLLLVTGMWMTSQYKVAGS</b> YICVYVWDDPNCKNEDYTNCTQECESKHGKEARPICREEKCFRCDFDFFPLPTPN<br>DDGNYGNNDGI                           | 68         | 8  | 4.37           | 7972.70         | 0      | 1         | 2  |
| <b>A. indica</b> |              |                                                                                                                                       |            |    |                |                 |        |           |    |
| AiNCR01          | CL27contig1  | <b>MTKLTLLNFFTFGLLITAMWMTSHHQVFG</b> EQCIDMWFDGCRNLDLHFKCSEDCGKHAIGECADEYCFCSYECDNNSPK                                                | 51         | 8  | 4.41           | 5875.44         | 0      | 21        | 2  |
| AiNCR02          | CL19contig1  | <b>MIKLTLLNFALVLLITAMSMINHGEAA</b> GTGFDSWVDKNCQENFYCIHSCRQKHGQSAMGEGGGSFCYCY                                                         | 46         | 6  | 6.02           | 5242.79         | 0      | 19        | 1  |
| AiNCR03          | CL25contig1  | <b>MTKFLTNVFAVLLVTVISITSHHQVGTI</b> AFDSWVDFYCATDNYNCIMSCRNKYGITGRGNCNDVFCVCFYKLLN                                                    | 48         | 6  | 6.06           | 5563.34         | 0      | 17        | 1  |
| AiNCR04          | CL25contig2  | <b>MTKFLTNVFAVLLVTVISITSHHQVGTI</b> AFDSWVDFYCATDNYNCIMSCRNKYGITGRGNCNDVFCVCFYKLLN                                                    | 48         | 6  | 6.06           | 5563.34         | 0      | 8         | 1  |
| AiNCR05          | CL84contig1  | <b>MTKLTLLNFFTLISVTAIITSHHQVASM</b> GFDTWIDIDCPLNNHSCIMNCRKYGLTASGKNCNDVFCFFYLLN                                                      | 47         | 7  | 5.34           | 4250.84         | 0      | 8         | 1  |
| AiNCR06          | CL45contig1  | <b>MIKLSLINFALVLLITAILMISHHEVA</b> CLGSDSWMDINCPGDDSDICNFHCKRKYGSSAWAMCSGSFCRCYH                                                      | 43         | 6  | 6.87           | 4840.44         | 0      | 7         | 1  |
| AiNCR07          | CL164contig1 | <b>MIKLTLLNFALVLLVAVISSHHQVDSI</b> QRDYVWDINCYNCVMDCKINHGDTAVGRCVGNLCYCTY                                                             | 41         | 6  | 5.36           | 4799.50         | 0      | 7         | 1  |
| AiNCR08          | CL343contig1 | <b>MINLIFTKFFALVLLMTAISHHQVGTI</b> EYDYVWDMCNVCAIDCVKHHGVTALGKVCNLCYCRYNMS                                                            | 44         | 7  | 6.70           | 5119.02         | 0      | 7         | 1  |
| AiNCR09          | CL107contig1 | <b>MVELTLVNFALVLLITDISMTHHHQVA</b> AFYFCLNDVWVDENCKEKGVSINCMEDCINKYGDTSNGFCFYNCYCQYKCPSPDSP<br>NSKDSPIEPHN                            | 67         | 8  | 4.13           | 7838.57         | 0      | 7         | 2  |
| AiNCR10          | CL19contig2  | <b>MTKLTLLNFFTFVLLMTAISMINHGKA</b> AAGTGFDSWIDKNCPMENFYCIHSCRQKHGQSAMGEGGGSFCYCY                                                      | 46         | 6  | 6.02           | 5289.90         | 0      | 6         | 1  |
| AiNCR11          | CL150contig1 | <b>MTKLTLLNFALVLLMTVISIISHHQVGTI</b> AFDSWVDFYCATDNYNCIMSCRNKHGITGMGNCKDVFCVYCYLLN                                                    | 48         | 6  | 5.36           | 5528.31         | 0      | 6         | 1  |
| AiNCR12          | CL46contig2  | <b>MTKLTLLKFFAILLVTAAMSMINHQA</b> AGATCEIETDLRCKLYDGGCWMDCKLYGSDASRGHCQDDYNYFCLEYCRPKYLAK                                             | 54         | 8  | 6.74           | 6367.34         | 0      | 6         | 1* |
| AiNCR13          | CL176contig1 | <b>MIRLILANFIVLVLVITISIRKHKVQV</b> SGFECWIDLDCPWENHTCIVSCRNKHGLTASGNCYDMFCYCYTY                                                       | 45         | 7  | 5.35           | 5355.06         | 0      | 5         | 1  |
| AiNCR14          | CL698contig1 | <b>MVKLTLLNFALVLLMAVTSKTIHHQVIG</b> YDCVEDWIDENCKEKGDYSTCFDFCDVKHGDIAIGYCEGHNFQYGSCTHIKDHIDIGY                                        | 59         | 8  | 4.25           | 6795.41         | 0      | 5         | 2  |
| AiNCR15          | CL425contig1 | <b>MVKLILNFALVLLMPPVTSKTIHRQVA</b> AYDVCENWIDENCKEKGDYSTCFDFCDVKHGDIAIGYCEGHKFCQYGSCTHTKDHID<br>IGY                                   | 59         | 8  | 4.49           | 6814.48         | 0      | 5         | 2  |
| AiNCR16          | CL88contig1  | <b>MVKLILNFALVLLMSVISKTIHYQV</b> TYDCVENWIDENCKEKGDYSTCFDFCDVKHGDIAIGYCEGHKFCQYGSCTHTKDHID<br>GY                                      | 59         | 8  | 4.49           | 6814.48         | 0      | 5         | 2  |
| AiNCR17          | CL172Contig1 | <b>MTKVLTLNFALVFLITVISMTRHHQV</b> AGYLGLDDWIDENCTRLFFSDSGCVKDKCKHKGDTGDGYCVDNRCFSYIEPDSPNYGD<br>SPDWSE                                | 63         | 6  | 4.15           | 7192.72         | 0      | 5         | 1  |
| AiNCR18          | CL286contig1 | <b>MSKLTLANFFSIVLLVTVILMITRHQV</b> TSEEILDSWIDINCPMDNFNCNWDCVHKHGATANGYCNNGNICCKYFLHS                                                 | 48         | 7  | 4.83           | 5513.18         | 0      | 5         | 1  |
| AiNCR19          | CL615Contig1 | <b>MIRLILANFFTPVLLMSAISITGKHQV</b> ATLGFATWIDGHCPRENLCIVNCRSEYGPSAKGMCDNVFCFYTYI                                                      | 46         | 6  | 5.48           | 5276.03         | 0      | 4         | 1  |
| AiNCR20          | CL848Contig1 | <b>MTRLTLINFFIPVLLMSAISTTSQHQV</b> AGGVGFANWIDLECPANFYCMIDCRSEYGPSAKGLCNDVFCFYTYIN                                                    | 47         | 6  | 4.44           | 5371.13         | 0      | 4         | 1  |
| AiNCR21          | CL521Contig1 | <b>MIKLTLANFFSILLVAAISMSTSQHQA</b> VAFSGFDKWDIDFDCPVTSLNCIADCRERYGALTRAYCINNVCFCFYTYQY                                                | 46         | 6  | 5.47           | 5487.19         | 0      | 4         | 1  |
| AiNCR22          | CL907Contig1 | <b>MTRLTLANFLIILLVAAISMSTSQHQA</b> VAFSGYDKWIDFDCPVTSLNCIADCRERYGALTRAYCINNVCFCFYTYQY                                                 | 48         | 6  | 5.47           | 5737.44         | 0      | 4         | 1  |
| AiNCR23          | CL288Contig1 | <b>MTKLILANFFILVLLMTAISMTSQYQV</b> ADSGYDKWINLDCEVTLLNCIADCKRKYGPARIAYCSNIYCYFYKY                                                     | 47         | 6  | 8.22           | 5583.40         | 0      | 4         | 1  |
| AiNCR24          | CL605Contig1 | <b>MTRLILANFFTLVLLMTAISMTSQHEVA</b> DSGYDKWIDLYCEVTSLNCAIECKRYGPIARAYCSSNIYCYFYSKY                                                    | 47         | 6  | 8.22           | 5556.38         | 0      | 4         | 1* |
| AiNCR25          | CL255Contig1 | <b>NLHVLYHFNSYLAAIWMAAGDHQVY</b> GDVCFDHFDFLGGCKNGDFDRCLDCTKHGNLATGEDEYDICYRYECCDKPYPLS                                               | 55         | 9  | 4.26           | 6391.05         | 0      | 4         | 2  |
| AiNCR26          | CL269Contig1 | <b>MIKLTLANFIVLVAISMKSNC</b> EVATTEDLARWYDSNLESDKTQIECKFRYGITAQGGCCDFLCCYFLMPDLVK                                                     | 53         | 8  | 4.46           | 6071.00         | 0      | 4         | 1* |
| AiNCR27          | CL45Contig2  | <b>MIKLSLTLNFALVLLITAILMISHHEVA</b> CLVSDSWMDINCPGDDSDICNFHCKRKYGSSAWAMCSGSFCRCYH                                                     | 43         | 6  | 6.87           | 4882.52         | 0      | 3         | 1  |
| AiNCR28          | CL92Contig2  | <b>MTNKLISLANFVAFMLLVTAISSSHNP</b> AMGILPCFDYWTDKNCPDNDNDCIQDCKDKYGNVVGNCNGYCYCRYACPRYTRME<br>GPHVLVDKVNINIDGMQYR                     | 75         | 8  | 5.59           | 8716.81         | 0      | 3         | 2  |
| AiNCR29          | CL339Contig1 | <b>MASKLTLANFVFMILLTAIWTSSHNP</b> AMGSI PCYDYWTDPNCPDDDDYCIQVCKERYGNSAVGNCNGCYCRYSCPRYT                                               | 51         | 9  | 4.27           | 5957.55         | 0      | 3         | 2  |
| AiNCR30          | CL396Contig1 | <b>MSFLLTNFFSIVLLVTAISMTHHQV</b> TSEEILDSWIDINCPDNFNCNWDCVKNHGATANGYCNNGNICCKYFLHS                                                    | 48         | 7  | 4.51           | 5472.10         | 0      | 3         | 1  |
| AiNCR31          | CL295Contig1 | <b>MTKLTLLNFALVLLVTAISITSHHHVNS</b> IQCDFDNDWIDICINNCSMDCIEKYGTALGKCVGKTYCCYESMS                                                      | 45         | 8  | 4.23           | 5118.90         | 0      | 3         | 1  |
| AiNCR32          | CL468Contig1 | <b>MNKLINWACIFGVFVVTAIMTNEVA</b> GEDCLDFWNPDRCKYSNQYICKTNCKTKHGDLAGSCLDRVCYAYVC                                                       | 47         | 8  | 6.77           | 5460.24         | 0      | 3         | 2  |
| AiNCR33          | CL45Contig3  | <b>MIKLSLTLNFALVLLITAILMISHHEVA</b> CLGSDSWMDINCPGDDSDICNFHCKRKYGSSAWAMCSGSFCRCYH                                                     | 43         | 6  | 6.87           | 4874.46         | 0      | 2         | 1  |
| AiNCR34          | CL831Contig1 | <b>MIKLTLLNFALVLLVTAIILISHREVA</b> SFGSDSWIDINCPDNDNFCNCRKYGSSAWAMCSGNFCHCY                                                           | 43         | 6  | 7.78           | 5082.65         | 0      | 2         | 1  |
| AiNCR35          | CL909Contig1 | <b>MASKLTLANFVFMILLMTAISSSHNP</b> AMGSI PCYDYWTDPNCPDDDDYCVQVQERYGNSAVGNCNGCYCRYSCPRYT                                                | 51         | 9  | 4.04           | 5943.48         | 0      | 2         | 2  |
| AiNCR36          | CL905Contig1 | <b>MTRIDFANFFTLILLIHWIIHQV</b> GTGFECWIDLDCPWENHTCIVSCRNKHGLTASGNCYDMFCYCYTY                                                          | 46         | 7  | 5.33           | 5456.16         | 0      | 2         | 1  |
| AiNCR37          | CL941Contig1 | <b>MSRLTLINFAVILLVIVSRNHLVAGD</b> LCYEEVWDENCINNGSYCMRDKCKKYGNTGDGLCALLKCVLYECPDSRSDSPEPRI                                            | 58         | 8  | 4.50           | 6693.55         | 0      | 2         | 2  |



| Sequence |                | Mature peptide (aa)                                                                        | Nbr of Cys | pI | Theoretical MW | Read count Root | Nodule                   | NCR motif |
|----------|----------------|--------------------------------------------------------------------------------------------|------------|----|----------------|-----------------|--------------------------|-----------|
| AeNCR42  | CL9423Contig1  | <b>KLNLVFN*YFAVISMYSYHHVDSIQCFDNWVDIDCINNCMSDCIEKYGFTVLGKCVGKTCYCCYE</b>                   | 42         | 8  | 4.23           | 4841.60         | stop codon               | 1         |
| AeNCR43  | CL4722Contig2  | <b>MTKLTLLINFFMFLVLLVTAMLMTSYDQVSGEVCFRVWYDLSCYRGNNSHRCSMACTNKYGDLAGMGRCDRGHCNCRYESEEC</b> | 50         | 8  | 6.93           | 5879.59         |                          | 1         |
| AeNCR44  | CL14243Contig1 | <b>MTKLTLAYIFVLLVLTVAISMTNEVAGEKKEEFWYEPQCKCPNYNGCMTDCKIKHGDSAKGACDYLDYCYTYD</b>           | 46         | 8  | 4.56           | 5373.00         |                          | 1         |
| AeNCR45  | CL26264Contig1 | <b>MTKLTLAYIFAVLLVTAISLITEVAGEECLDYWYDRRCRRRNYKGCMRDCKDYGDSANGFCDFLDFCFCSFD</b>            | 46         | 7  | 5.12           | 5670.31         |                          | 1         |
| AeNCR46  | CL11729Contig1 | <b>MTKLTLLINFFTFALLVAGILMYSYHQVSGEVCFFHLWSDLNCHKGDSLHCLVACTNKYGDLAGKRCSDYCNCRYESEK</b>     | 50         | 8  | 5.80           | 5734.43         |                          | 1         |
| AeNCR47  | CL6739Contig2  | <b>MIKLTLANIFLLTLLMTVISRTSSCEAAHIDGFVRWDFSCAENDKSCHECLRLRFGATAQGFCEDEVFCCCN</b>            | 46         | 7  | 4.96           | 5315.97         |                          | 1         |
| AeNCR48  | CL3731Contig2  | <b>YFAVIMINRVEMAGTGFDSWVDKNCPLNFYCIHSCRQKHGQSAMGECGGSFYCY</b>                              | 58         | 6  | 6.02           | 5064.64         | signal peptide truncated | 1         |
| AeNCR49  | CL13080Contig2 | <b>MAKLTSTNFFALLTLLISVILMISHHEATEMGFESWIDIDCPVDFHCKDICGKKGPTTSAEKNEIFCYCY</b>              | 45         | 6  | 4.28           | 5213.86         |                          | 1         |
| AeNCR50  | CL682Contig4   | <b>MNKLNWACIFGLVFFVTAIIMTNEVVGEDCLDFWSDPRCKYSNQYICKTCKKHGDLAIGSCLDRVCYCA</b>               | 45         | 7  | 6.78           | 5230.94         |                          | 1         |
| AeNCR51  | CL12848Contig1 | <b>FTVILITSHHQVDSIQRYDYWVDINCIYNCMIDCINKHGDTALGR</b>                                       | 34         | 4  | 5.36           | 3966.55         | signal peptide truncated | no        |
| AeNCR52  | CL2051Contig2  | <b>MSKLTLAIFPLVLLVTVMMVMSIPCFDYWSNMNCPDDDDNCIQCTCKDRYGD</b>                                | 42         | 7  | 3.69           | 4828.20         |                          | no        |
| AeNCR53  | CL4958Contig2  | <b>IFYFN*YFAAIWIKNHGQVAGDLCFEEWVDENCINNGSYDCMRDCKNKYGTGDLCAVLKCVCLYE</b>                   | 43         | 6  | 6.70           | 5043.62         | stop codon               | 1         |
| AeNCR54  | CL682Contig1   | <b>MNKLNWACIFGLVFFVTAISMTSEVAGEDCLDVWYEPHCFEQKSNVCKKNCKSKHGLANGFCNASDLICY</b>              | 44         | 6  | 5.44           | 5056.68         |                          | no        |
| AeNCR55  | CL1Contig16    | <b>LFYIT**KDAISTSSHNPAMGSI</b>                                                             | 46         | 8  | 3.80           | 5336.78         | stop codon               | 1         |
| AeNCR56  | CL10596Contig3 | <b>MQQLTANFFALLVLLGIVISMISHHVAGDL</b>                                                      | 26         | 4  | 3.61           | 3107.42         |                          | no        |
| AeNCR57  | CL5726Contig1  | <b>LSFN*YFAAIWIKNHGQVAGDLCFEEWVDENCINNGSYDCMRDCKNKYGTGDLCAVLKCVCLYE</b>                    | 46         | 7  | 4.16           | 5247.90         | stop codon               | 1         |
| AeNCR58  | CL4882Contig4  | <b>FAAISMISHHQVAGVTCIEIWDLRCKLYDGGCWLDC</b>                                                | 48         | 8  | 5.57           | 5590.43         | signal peptide truncated | 1*        |
| AeNCR59  | CL2051Contig4  | <b>LINFAAILMSSHNSVMVMGSI</b>                                                               | 45         | 8  | 3.90           | 5250.70         | signal peptide truncated | 1         |
| AeNCR60  | CL2051Contig3  | <b>TILMSSHNSVMVMGSI</b>                                                                    | 42         | 7  | 3.69           | 4828.20         | signal peptide truncated | no        |
| AeNCR61  | CL27458Contig1 | <b>IFALVFLVTAISMTSNRYVTSTRFSKSWIDVQCPKEDLNCSNLCNENYGP</b>                                  | 61         | 5  | 4.86           | 4644.32         | signal peptide truncated | no        |
| AeNCR62  | CL682Contig3   | <b>FLALIFLLTAISMTSEVAGEDCLDVWYEPHCFEQKSNVCKKNCKSKHGLANGFCNASDLICY</b>                      | 44         | 6  | 5.44           | 5056.68         | signal peptide truncated | no        |
| AeNCR63  | CL11599Contig2 | <b>NMHVIFHLN*YFAVTSMTNHHQIAGIMCTKYWFD</b>                                                  | 33         | 4  | 8.49           | 3940.56         | stop codon               | no        |
| AeNCR64  | CL12457Contig1 | <b>MVKSTLATFFVILLVTAIIMTSHHPVMAGYCV</b>                                                    | 48         | 7  | 4.24           | 5657.32         |                          | 1         |
| AeNCR65  | CL7951Contig1  | <b>IFALVFLVTAISMTSEATGEDCLHIWYEPQCEFRNHNVCNMNCKTKHGDI</b>                                  | 65         | 7  | 4.72           | 6237.01         | signal peptide truncated | 1         |
| AeNCR66  | CL24618Contig1 | <b>MTKLTLLINIFALVFLVSVISMISDVAGKKGQSWYDLQCKDPNYNGCTKDCINKY</b>                             | 29         | 4  | 8.45           | 3373.80         |                          | no        |
| AeNCR67  | CL19676Contig1 | <b>MIKLTLANVFLVFLVSVISMISDVAGKKGQSWYDLQCKDPNYNGCTKDCINKY</b>                               | 46         | 7  | 6.86           | 5708.56         |                          | 1         |
| AeNCR68  | CL3827Contig1  | <b>ILHFY*YFTAILMMISHHEVA</b>                                                               | 43         | 6  | 6.87           | 4868.45         | stop codon               | 1         |
| AeNCR69  | CL10339Contig1 | <b>MTKLTLANNFALLVAVISMISDVAGDGKIGKVVYDAQCQY</b>                                            | 47         | 7  | 4.86           | 5615.29         |                          | 1         |
| AeNCR70  | CL4722Contig1  | <b>LTKIQTCNL*FEFIVAMLMTSYDQVSGEVCFRVWYDLSCYRGNNSHRCSMACTNKYGDLAGMGRCDRGHCNCRYESEEC</b>     | 50         | 8  | 6.93           | 5879.59         | stop codon               | 1         |
| AeNCR71  | CL682Contig2   | <b>FVAIIMTNEVVGEDCLDFWSDPRCKYSNQYICKTCKKHGDLAIGSCLDRVCYCA</b>                              | 57         | 7  | 6.78           | 5230.94         | signal peptide truncated | 1         |
| AeNCR72  | CL8283Contig3  | <b>DTWIDQNCPWESFYCRLSCRTHKGGKAMGECGGGPFYCY</b>                                             | 41         | 6  | ND             |                 | ND signal peptide absent | 1*        |
| AeNCR73  | CL24495Contig1 | <b>LSFN*YFVISTKNHHLVAGDVCFEWVDLNCINNDPNYCMRDCKNKYGD</b>                                    | 36         | 5  | 3.98           | 4163.58         | stop codon               | no        |
| AeNCR74  | CL1101Contig4  | <b>MTKLIVANIFSVLLVTAIIMRSEVVDASSELVYDINCKDPGYNTECMQYCIDKHGYTARGSCLYNNYCYC</b>              | 44         | 6  | 4.83           | 5073.64         |                          | 1*        |
| AeNCR75  | CL1159Contig4  | <b>MIKLTLLINFFALVLLITDDWFDENCEKISIDCMEDCINKYGDTSNGFC</b>                                   | 59         | 6  | 3.97           | 4895.36         |                          | 1         |
| AeNCR76  | CL6739Contig3  | <b>FAVISRTSSCEAAHIDGFVRWDFSCAENDKSCHECLRLRFGATAQGFCEDEVFCCCN</b>                           | 58         | 8  | 4.95           | 4822.45         | signal peptide truncated | 1         |
| AeNCR77  | CL6739Contig1  | <b>LKYHVISRTSSCEAAHIDGFVRWDFSCAENDKSCHECLRLRFGATAQGFCEDEVFCCCN</b>                         | 60         | 8  | 4.96           | 4822.46         | signal peptide truncated | 1         |
| AeNCR78  | CL13080Contig1 | <b>YFAVILMISHHEATEMGFESWIDIDCPVDFHCKDICGKKGPTTSAEKNEIFCYCY</b>                             | 58         | 6  | 4.38           | 4795.39         | signal peptide truncated | 1         |
| AeNCR79  | CL15279Contig1 | <b>IYKFLNI*FVAISMYSKVDGKECLAVWYEPQCEYPNNVCMMNCKTNHGYLAGVCGDIFCYCNYD</b>                    | 67         | 7  | 4.50           | 5277.99         | stop codon               | 1         |
| AeNCR80  | CL25922Contig1 | <b>FVAISLITEVAGEECLDYWYDRRCRRRNYKGCMRDCKDKYGD</b>                                          | 58         | 7  | 5.12           | 5670.31         | signal peptide truncated | 1         |
| AeNCR81  | CL11729Contig2 | <b>KIQTHNLSF*FIFAGILMYSYHQVSGEVCFFHLWSDLNCHKGDSLHCLVACTNKYGDLAGK</b>                       | 34         | 4  | 6.27           | 3778.31         | stop codon               | no        |
| AeNCR82  | CL1101Contig2  | <b>TLFLFLIEDAAILMRSEVVDASSELVYDINCKDPGYNTECMQYCIDKHGYTARGSCLYNNYCYC</b>                    | 65         | 6  | 4.83           | 5073.64         | signal peptide truncated | 1*        |



| Gene name         | Protein function                                                                  | Protein mass (Da) | ORS285 free-living state | Bacteroid A. indica ORS285 | Bacteroid A. afraspera ORS285 | ORS285 free-living state |                      |                            |                       | Bacteroid A. indica - ORS285 |                      |                                                                                                                                                                                                                                  |                                                       | Bacteroid A. afraspera - ORS285 |                      |                                                                                                                                                                        |                                                       |
|-------------------|-----------------------------------------------------------------------------------|-------------------|--------------------------|----------------------------|-------------------------------|--------------------------|----------------------|----------------------------|-----------------------|------------------------------|----------------------|----------------------------------------------------------------------------------------------------------------------------------------------------------------------------------------------------------------------------------|-------------------------------------------------------|---------------------------------|----------------------|------------------------------------------------------------------------------------------------------------------------------------------------------------------------|-------------------------------------------------------|
|                   |                                                                                   |                   |                          |                            |                               | Mascot Protein score     | Protein coverage (%) | Peptide sequences          | Peptide modifications | Mascot Protein score         | Protein coverage (%) | Peptide sequences                                                                                                                                                                                                                | Peptide modifications                                 | Mascot Protein score            | Protein coverage (%) | Peptide sequences                                                                                                                                                      | Peptide modifications                                 |
| BRAO285v1_1200089 | conserved protein of unknown function                                             | 7603              | 125 / 31                 | 678 / 98,6<br>229 / 50,7   | 198 / 45,1<br>602 / 98,6      | 125                      | 31                   | MDNITLHVR<br>FAPDGTVAEISER | Oxidation (M)         | 678<br>229                   | 98,6<br>50,7         | AYQTFAGGR<br>MDNITLHVR<br>DQVEALKATAAA<br>FAPDGTVAEISER<br>AYQTFAGGRGVFK<br>TTRDQVEALKATAAA<br>LSEAIGLKAYQTFAGGR<br>PATLTPQQWFNKLSEAIGLK<br>FAPDGTVAEISERPATLTPQQWFNK<br><br>GVFKTTR<br>MDNITLHVR<br>TTRDQVEALK<br>FAPDGTVAEISER | Deamidated (NQ)<br>Oxidation (M)<br><br>Oxidation (M) | 198<br>602                      | 45,1<br>98,6         | MDNITLHVR<br>TTRDQVEALK<br>FAPDGTVAEISER<br>AYQTFAGGRGVFK<br>PATLTPQQWFNK<br>TTRDQVEALKATAAA<br>LSEAIGLKAYQTFAGGR<br>PATLTPQQWFNKLSEAIGLK<br>FAPDGTVAEISERPATLTPQQWFNK | Oxidation (M)<br><br>Deamidated (NQ)<br>Oxidation (M) |
| BRAO285v1_1200091 | conserved protein of unknown function                                             | 5597              | 55 / 17,9                | 76 / 17,9<br>108 / 64,3    | 105 / 64,3                    | 55                       | 17,9                 | LIEALASMPK                 | Oxidation (M)         | 76<br>108                    | 17,9<br>64,3         | LIEALASMPK<br>VDALVELVAEQGPGAPAEVILQPSLDE                                                                                                                                                                                        | Oxidation (M)<br>Oxidation (M)                        | 105                             | 64,3                 | LIEALASMPK<br>VDALVELVAEQGPGAPAEVILQPSLDE                                                                                                                              | Oxidation (M)                                         |
| BRAO285v1_1200098 | conserved protein of unknown function                                             | 8237              | /                        | 262 / 67,9                 | 64 / 11,5<br>342 / 83,3       |                          |                      |                            |                       | 262                          | 67,9                 | AMAATDIER<br>GQMGGLVHALALETSLPK<br>EAFPPDAVVVIEDLAGDGDHYSAR<br>LIKEAFPPDAVVVIEDLAGDGDHYSAR                                                                                                                                       | Oxidation (M)                                         | 64<br>342                       | 11,5<br>83,3         | AMAATDIER<br>GQMGGLVHALALETSLPK<br>EAFPPDAVVVIEDLAGDGDHYSAR<br>VQQHQVMVYSALGQMGGLVHALALETSLPK                                                                          | Oxidation (M)                                         |
| BRAO285v1_1200103 | nifH nitrogenase iron protein, nifH                                               | 31894             | /                        | 114 / 10,5                 | /                             |                          |                      |                            |                       | 114                          | 10,5                 | CVESGGPEPGVGCAGR<br>VLEYPADSVQAGHYR                                                                                                                                                                                              |                                                       |                                 |                      |                                                                                                                                                                        |                                                       |
| BRAO285v1_1200113 | mop putative Molybdenum-pterin binding protein (Mop)                              | 6882              | 63 / 17,6                | 235 / 79,4<br>63 / 17,6    | 51 / 17,6<br>155 / 61,6       | 63                       |                      | NVLPKVISVAK                |                       | 235<br>63                    | 79,4<br>17,6         | NVLPKVISVAK<br>VELAPGLTVFSAITNEAVEELGLAVGDQVSAVIK<br>GATTAHVKVELAPGLTVFSAITNEAVEELGLAVGDQVSAVIK<br><br>NVLPKVISVAK                                                                                                               |                                                       | 51<br>155                       | 17,6<br>61,6         | NVLPKVISVAK<br>VELAPGLTVFSAITNEAVEELGLAVGDQVSAVIK<br>GATTAHVKVELAPGLTVFSAITNEAVEELGLAVGDQVSAVIK                                                                        |                                                       |
| BRAO285v1_1200160 | conserved protein of unknown function                                             | 6926              | 72 / 20,6                | 78 / 20,6                  | 79 / 20,6                     | 72                       | 20,6                 | LGAPSEAVESLR               |                       | 78                           | 20,6                 | LGAPSEAVESLR                                                                                                                                                                                                                     |                                                       | 79                              | 20,6                 | LGAPSEAVESLR                                                                                                                                                           |                                                       |
| BRAO285v1_1220114 | putative periplasmic mannitol-binding protein                                     | 40397             | 83 / 3,9                 | /                          | /                             | 83                       | 3,9                  | SLDTIYGGAEYMAK             |                       |                              |                      |                                                                                                                                                                                                                                  |                                                       |                                 |                      |                                                                                                                                                                        |                                                       |
| BRAO285v1_1220119 | conserved exported protein of unknown function                                    | 9730              | 50 / 13,2                | /                          | /                             | 50                       | 13,2                 | DEYVVQGPSHR                |                       |                              |                      |                                                                                                                                                                                                                                  |                                                       |                                 |                      |                                                                                                                                                                        |                                                       |
| BRAO285v1_130041  | phbA acetyl-CoA acetyltransferase with thiolase domain (Acetoacetyl-CoA thiolase) | 40812             | 58 / 2,8                 | /                          | /                             | 58                       | 2,8                  | SDDVVIVSAAR                |                       |                              |                      |                                                                                                                                                                                                                                  |                                                       |                                 |                      |                                                                                                                                                                        |                                                       |
| BRAO285v1_1320032 | conserved protein of unknown function                                             | 8776              | 76 / 11,1                | /                          | /                             | 76                       | 11,1                 | VISPGSVYR                  |                       |                              |                      |                                                                                                                                                                                                                                  |                                                       |                                 |                      |                                                                                                                                                                        |                                                       |
| BRAO285v1_1440053 | conserved protein of unknown function                                             | 8501              | /                        | 99 / 22,5                  | 99 / 22,5                     |                          |                      |                            |                       | 99                           | 22,5                 | SAADPGGVLCDIDTVAR                                                                                                                                                                                                                |                                                       | 99                              | 22,5                 | SAADPGGVLCDIDTVAR                                                                                                                                                      |                                                       |
| BRAO285v1_1450020 | putative glutaminase                                                              | 68031             | 49 / 1,1                 | /                          | /                             | 49                       | 1,1                  | NLAQLLA                    | Deamidated (NQ)       |                              |                      |                                                                                                                                                                                                                                  |                                                       |                                 |                      |                                                                                                                                                                        |                                                       |
| BRAO285v1_1460012 | conserved exported protein of unknown function                                    | 10997             | 96 / 20                  | /                          | 78 / 20                       | 96                       | 20                   | GAAIGAVIGAGTGAAIAADGER     |                       |                              |                      |                                                                                                                                                                                                                                  |                                                       | 78                              | 20                   | GAAIGAVIGAGTGAAIAADGER                                                                                                                                                 |                                                       |
| BRAO285v1_1520084 | glnA Glutamine synthetase I (Glutamate--ammonia ligase I) (GSI)                   | 52612             | /                        | 52 / 2,8                   | /                             |                          |                      |                            |                       | 52                           | 2,8                  | AIKDNVDKVVDLR                                                                                                                                                                                                                    |                                                       |                                 |                      |                                                                                                                                                                        |                                                       |
| BRAO285v1_1580051 | putative endoribonuclease L-PSP (protein synthesis inhibitor) (modular protein)   | 15831             | 104 / 12,2               | /                          | /                             | 104                      | 12,2                 | AGTVEQTLAAQINLPAPK         |                       |                              |                      |                                                                                                                                                                                                                                  |                                                       |                                 |                      |                                                                                                                                                                        |                                                       |
| BRAO285v1_1640009 | putative 50S ribosomal protein L36                                                | 4987              | /                        | 68 / 21,4                  | /                             |                          |                      |                            |                       | 68                           | 21,4                 | VYVINKVQR                                                                                                                                                                                                                        |                                                       |                                 |                      |                                                                                                                                                                        |                                                       |
| BRAO285v1_1740028 | rpsP 30S ribosomal protein S16                                                    | 12407             | /                        | 55 / 9                     | /                             |                          |                      |                            |                       | 55                           | 9                    | FLDTAGVKKR                                                                                                                                                                                                                       |                                                       |                                 |                      |                                                                                                                                                                        |                                                       |
| BRAO285v1_190026  | conserved protein of unknown function                                             | 20668             | 52 / 4,2                 | 54 / 4,2<br>58 / 4,2       | 63 / 4,2<br>53 / 4,2          | 52                       | 4,2                  | IASLISPR                   |                       | 54<br>58                     | 4,2                  | IASLISPR                                                                                                                                                                                                                         |                                                       | 63<br>53                        | 4,2<br>4,2           | IASLISPR<br>IASLISPR                                                                                                                                                   |                                                       |
| BRAO285v1_1910004 | conserved protein of unknown function                                             | 7521              | 51 / 24,6                | 496 / 81,2                 | 374 / 81,2                    | 51                       | 24,6                 | QITEQAASQSGAADEER          |                       | 496                          | 81,2                 | LAQOSELDALLK<br>SLTDPTLSAADLADR<br>QITEQAASQSGAADEER<br>LAQOSELDALLKEQER<br>LAQOSELDALLKEQER<br>SLTDPTLSAADLADRIAILR<br>VFDELGADKQAEAAALK                                                                                        | Deamidated (NQ)                                       | 374                             | 81,2                 | SLTDPTLSAADLADR<br>QITEQAASQSGAADEER<br>LAQOSELDALLKEQER<br>SLTDPTLSAADLADRIAILR                                                                                       |                                                       |
| BRAO285v1_1910012 | conserved protein of unknown function                                             | 6797              | 91 / 24,2                | /                          | /                             | 91                       | 24,2                 | EAFESAAAAATLALK            |                       |                              |                      |                                                                                                                                                                                                                                  |                                                       |                                 |                      |                                                                                                                                                                        |                                                       |
| BRAO285v1_1950033 | 50S ribosomal protein L29                                                         | 7896              | /                        | 53 / 23,2                  | /                             |                          |                      |                            |                       | 53                           | 23,2                 | AMSPDQMDAIVNKK                                                                                                                                                                                                                   | 2 Oxidation (M)                                       |                                 |                      |                                                                                                                                                                        |                                                       |
| BRAO285v1_1950040 | rplF 50S ribosomal subunit protein L6                                             | 19326             | /                        | /                          | 61 / 5,1                      |                          |                      |                            |                       |                              |                      |                                                                                                                                                                                                                                  |                                                       | 61                              | 5,1                  | VGVAAEIR                                                                                                                                                               |                                                       |
| BRAO285v1_1950043 | rpmD 50S ribosomal subunit protein L30                                            | 7114              | 49 / 17,2                | 184 / 40,6                 | 116 / 21,9                    | 49                       | 17,2                 | VTLPDTPAVR                 |                       | 184                          | 40,6                 | VTLPDTPAVR<br>TIKIQGSPR<br>IGRVTELPDTPAVR                                                                                                                                                                                        |                                                       | 116                             | 21,9                 | VTLPDTPAVR<br>IGRVTELPDTPAVR                                                                                                                                           |                                                       |

| Gene name         | Protein function                                                    | Protein mass (Da) | ORS285 free-living state | Bacteroid A. indica ORS285 | Bacteroid A. afraspera ORS285 | ORS285 free-living state |                      |                                                                                                               |                                  | Bacteroid A. indica - ORS285 |                      |                                                                                                     |                       | Bacteroid A. afraspera - ORS285 |                      |                                                                                                                                                 |                                  |
|-------------------|---------------------------------------------------------------------|-------------------|--------------------------|----------------------------|-------------------------------|--------------------------|----------------------|---------------------------------------------------------------------------------------------------------------|----------------------------------|------------------------------|----------------------|-----------------------------------------------------------------------------------------------------|-----------------------|---------------------------------|----------------------|-------------------------------------------------------------------------------------------------------------------------------------------------|----------------------------------|
|                   |                                                                     |                   |                          |                            |                               | Mascot Protein score     | Protein coverage (%) | Peptide sequences                                                                                             | Peptide modifications            | Mascot Protein score         | Protein coverage (%) | Peptide sequences                                                                                   | Peptide modifications | Mascot Protein score            | Protein coverage (%) | Peptide sequences                                                                                                                               | Peptide modifications            |
| BRAO285v1_2000062 | conserved protein of unknown function                               | 6768              | 336 / 69                 | 69 / 22,4<br>72 / 22,4     | 73 / 22,4<br>67 / 22,4        | 336                      | 69                   | TNDLKLVER<br>MTNDLKLVER<br>SFAYGNTNIENER<br>QIEMTPDQLGEQR<br>SFAYGNTNIENERITR                                 | Deamidated (NQ)<br>Oxidation (M) | 69<br>72                     | 22,4<br>22,4         | SFAYGNTNIENER<br>SFAYGNTNIENER                                                                      |                       | 73<br>67                        | 22,4<br>22,4         | SFAYGNTNIENER<br>SFAYGNTNIENER                                                                                                                  |                                  |
| BRAO285v1_200016  | putative transcriptional regulatory protein                         | 14806             | /                        | 63 / 9,1                   | /                             |                          | 63                   |                                                                                                               |                                  |                              | 9,1                  | SAGKPDIELGKR                                                                                        |                       |                                 |                      |                                                                                                                                                 |                                  |
| BRAO285v1_200029  | ccoQ Transmembrane protein                                          | 6115              | /                        | /                          | 55 / 25,9                     |                          |                      |                                                                                                               |                                  |                              |                      |                                                                                                     |                       | 55                              | 25,9                 | AAFDEAANMPLREE                                                                                                                                  |                                  |
| BRAO285v1_2010015 | groL 60 kDa chaperonin (Protein Cpn60) (groEL protein)              | 57790             | /                        | /                          | 54 / 2,2                      |                          |                      |                                                                                                               |                                  |                              |                      |                                                                                                     |                       | 54                              | 2,2                  | NVVLDSFGAPR                                                                                                                                     |                                  |
| BRAO285v1_2020033 | cspA Cold shock protein, DNA binding                                | 7526              | /                        | 274 / 78,9                 | 397 / 78,9                    |                          | 274                  | SMGTVKWFNATK<br>EGQKISYEIVADR<br>AGLGLTREGQKISYEIVADR<br>GYGFIQDDGGNDVVFHISAVR<br>WFNATKGYGFIQDDGGNDVVFHISAVR | Oxidation (M)                    |                              | 78,9                 | SMGTVKWFNATK<br>EGQKISYEIVADR<br>AGLGLTREGQKISYEIVADR<br>GYGFIQDDGGNDVVFHISAVR                      |                       | 397                             | 78,9                 | SMGTVKWFNATK<br>EGQKISYEIVADR<br>EGQKISYEIVADR<br>EGQKISYEIVADR<br>AGLGLTREGQKISYEIVADR<br>GYGFIQDDGGNDVVFHISAVR<br>WFNATKGYGFIQDDGGNDVVFHISAVR | Oxidation (M)                    |
| BRAO285v1_2040006 | conserved protein of unknown function                               | 7257              | /                        | 334 / 80,6                 | 121 / 16,1                    |                          | 334                  | LMVKDEIER<br>LRQVTETLH<br>KLMVKDEIER<br>AIQAHLVELER<br>VLENEHLHALVHPSTDDL                                     | Oxidation (M)                    |                              | 80,6                 | LMVKDEIER<br>LRQVTETLH<br>KLMVKDEIER<br>AIQAHLVELER<br>VLENEHLHALVHPSTDDL                           |                       | 121                             | 16,1                 | LMVKDEIER<br>KLMVKDEIER                                                                                                                         | Oxidation (M)                    |
| BRAO285v1_2040025 | putative transcriptional regulator/antitoxin, MazE                  | 8451              | 62 / 14,7                | 95 / 14,7                  | 72 / 14,7                     | 62                       | 14,7                 | IGNSDGLLLPR                                                                                                   |                                  | 95                           | 14,7                 | IGNSDGLLLPR                                                                                         |                       | 72                              | 14,7                 | IGNSDGLLLPR                                                                                                                                     |                                  |
| BRAO285v1_2110001 | conserved protein of unknown function                               | 9052              | 60 / 11,6                | /                          | /                             | 60                       | 11,6                 | DQNSVSLLLR                                                                                                    |                                  |                              |                      |                                                                                                     |                       |                                 |                      |                                                                                                                                                 |                                  |
| BRAO285v1_2190017 | putative Isomerase/Decarboxylase related protein family             |                   | /                        | 55 / 6                     | 67 / 6                        |                          | 55                   | 6                                                                                                             | IAALDPASLPAVSGKPR                |                              |                      |                                                                                                     |                       | 67                              | 6                    | IAALDPASLPAVSGKPR                                                                                                                               |                                  |
| BRAO285v1_2480007 | cspA Cold shock protein, DNA binding                                |                   | /                        | 62 / 18,1                  | /                             |                          | 62                   | 18,1                                                                                                          | AMTGTVKFFNGER                    |                              |                      |                                                                                                     | Deamidated (NQ)       |                                 |                      |                                                                                                                                                 |                                  |
| BRAO285v1_2570023 | putative ABC transporter (substrate-binding protein)                | 30727             | 51 / 3,1                 | 54 / 3,1<br>60 / 3,1       | 64 / 3,1                      | 51                       | 3,1                  | VAVTSLVGP                                                                                                     |                                  | 54<br>60                     | 3,1<br>3,1           | VAVTSLVGP<br>VAVTSLVGP                                                                              |                       | 64                              | 3,1                  | VAVTSLVGP                                                                                                                                       |                                  |
| BRAO285v1_2890040 | aldehyde dehydrogenase                                              | 50682             | 52 / 2,7                 | /                          | /                             | 52                       | 2,7                  | AGNVNLQGVPNDR                                                                                                 |                                  |                              |                      |                                                                                                     |                       |                                 |                      |                                                                                                                                                 |                                  |
| BRAO285v1_290022  | conserved protein of unknown function                               |                   | /                        | 153 / 39,4                 | 53 / 22,7<br>150 / 39,4       |                          | 153                  | 39,4                                                                                                          | LLEILVCPMTK<br>GPLEYDAAKQELVSR   |                              |                      |                                                                                                     | Oxidation (M)         | 53<br>150                       | 22,7<br>39,4         | GPLEYDAAKQELVSR<br>LLEILVCPMTK<br>GPLEYDAAKQELVSR                                                                                               |                                  |
| BRAO285v1_2940016 | conserved protein of unknown function                               | 6881              | 49 / 17,7                | /                          | /                             | 49                       | 17,7                 | TAEFSEALDRK                                                                                                   |                                  |                              |                      |                                                                                                     |                       |                                 |                      |                                                                                                                                                 |                                  |
| BRAO285v1_2940028 | cspA Cold shock protein, DNA binding (modular protein)              | 7576              | /                        | 84 / 28,6                  | 52 / 28,6                     |                          | 84                   | 28,6                                                                                                          | AGLTLNENQAIYDLVESR               |                              |                      |                                                                                                     |                       | 52                              | 28,6                 | AGLTLNENQAIYDLVESR                                                                                                                              | Deamidated (NQ)                  |
| BRAO285v1_2940061 | conserved protein of unknown function                               | 10103             | 125 / 22,2               | /                          | /                             | 125                      | 22,2                 | VLVDDGTCPAGQVK<br>VLVDDGTCPAGQKVEVLGSK                                                                        |                                  |                              |                      |                                                                                                     |                       |                                 |                      |                                                                                                                                                 |                                  |
| BRAO285v1_2940101 | conserved protein of unknown function                               | 6698              | 147 / 55,7               | /                          | /                             | 147                      | 55,7                 | QMLEMHGPAIAQASQK<br>ALSCSDGESEAREWR                                                                           | Oxidation (M)                    |                              |                      |                                                                                                     |                       |                                 |                      |                                                                                                                                                 |                                  |
| BRAO285v1_2960006 | conserved exported protein of unknown function                      | 10525             | 201 / 41,8               | /                          | /                             | 201                      | 41,8                 | QFVESGDDTIK<br>VVLDSLTMSCK<br>FGTYCAEHPVIVTAAEK                                                               | Oxidation (M)                    |                              |                      |                                                                                                     |                       |                                 |                      |                                                                                                                                                 |                                  |
| BRAO285v1_2960016 | protein of unknown function                                         | 9215              | 56 / 13,3                | /                          | /                             | 56                       | 13,3                 | MFGYNDVATGR                                                                                                   | Oxidation (M)                    |                              |                      |                                                                                                     |                       |                                 |                      |                                                                                                                                                 |                                  |
| BRAO285v1_2980014 | conserved protein of unknown function                               | 15535             | 75 / 9,9                 | /                          | /                             | 75                       | 9,9                  | LGGVYTGVTEDQLR                                                                                                |                                  |                              |                      |                                                                                                     |                       |                                 |                      |                                                                                                                                                 |                                  |
| BRAO285v1_310002  | putative Type III polyketide synthase                               | 36220             | /                        | 55 / 2,6                   | 55 / 2,6                      |                          | 55                   | 2,6                                                                                                           | MRPATRASR                        |                              |                      |                                                                                                     |                       | 55                              | 2,6                  | MRPATRASR                                                                                                                                       |                                  |
| BRAO285v1_340006  | conserved protein of unknown function                               | 18871             | 70 / 8,4                 | /                          | /                             | 70                       | 8,4                  | LQMHLQETNQQQLQR                                                                                               | Oxidation (M)                    |                              |                      |                                                                                                     |                       |                                 |                      |                                                                                                                                                 |                                  |
| BRAO285v1_340020  | conserved exported protein of unknown function                      | 22686             | /                        | /                          | 104 / 8,3                     |                          |                      |                                                                                                               |                                  |                              |                      |                                                                                                     |                       | 104                             | 8,3                  | AADDAQDKDVPVVAR<br>MKAADDAQDKDVPVVAR                                                                                                            | Deamidated (NQ)<br>Oxidation (M) |
| BRAO285v1_360070  | conserved protein of unknown function                               | 7016              | /                        | 88 / 18,2<br>74 / 18,2     | 71 / 18,2                     |                          | 88<br>74             | 18,2<br>18,2                                                                                                  | ALALGIGLGHQR<br>ALALGIGLGHQR     |                              |                      |                                                                                                     |                       | 71                              | 18,2                 | ALALGIGLGHQR                                                                                                                                    |                                  |
| BRAO285v1_530001  | conserved protein of unknown function                               | 16055             | 69 / 6,3                 | /                          | /                             | 69                       | 6,3                  | FFTAQGLDNR                                                                                                    |                                  |                              |                      |                                                                                                     |                       |                                 |                      |                                                                                                                                                 |                                  |
| BRAO285v1_570007  | putative phosphoribosylformylglycinamide synthetase, PurS component | 8255              | 51 / 13,6                | 424 / 93,8                 | 298 / 64,2                    | 51                       | 13,6                 | SLGVDGVASVR                                                                                                   |                                  | 424                          | 93,8                 | SLGVDGVASVR<br>SLGVDGVASVRQGK<br>AIEGALKSLGVDGVASVR<br>VFDFELAGADKAAQEAALK<br>AAADKLLANTVIENRYVELLG |                       | 298                             | 64,2                 | SLGVDGVASVR<br>VTVTLTKGLDPQK<br>AIEGALKSLGVDGVASVR<br>VFDFELAGADKAAQEAALK<br>TGILDPQKAIAGALKSLGVDGVASVR                                         |                                  |

| Gene name        | Protein function                                                                                  | Protein mass (Da) | ORS285 free-living state | Bacteroid A. indica ORS285 | Bacteroid A. afraspera ORS285 | ORS285 free-living state |                      |                                                                                                                                                                                                                                                           |                                                              | Bacteroid A. indica - ORS285 |                      |                                                                                                                                                                                                                                                                                                   |                                                                                            | Bacteroid A. afraspera - ORS285 |                      |                                                                                                            |                                                                |
|------------------|---------------------------------------------------------------------------------------------------|-------------------|--------------------------|----------------------------|-------------------------------|--------------------------|----------------------|-----------------------------------------------------------------------------------------------------------------------------------------------------------------------------------------------------------------------------------------------------------|--------------------------------------------------------------|------------------------------|----------------------|---------------------------------------------------------------------------------------------------------------------------------------------------------------------------------------------------------------------------------------------------------------------------------------------------|--------------------------------------------------------------------------------------------|---------------------------------|----------------------|------------------------------------------------------------------------------------------------------------|----------------------------------------------------------------|
|                  |                                                                                                   |                   |                          |                            |                               | Mascot Protein score     | Protein coverage (%) | Peptide sequences                                                                                                                                                                                                                                         | Peptide modifications                                        | Mascot Protein score         | Protein coverage (%) | Peptide sequences                                                                                                                                                                                                                                                                                 | Peptide modifications                                                                      | Mascot Protein score            | Protein coverage (%) | Peptide sequences                                                                                          | Peptide modifications                                          |
| BRAO285v1_620078 | HupA DNA-binding protein HU                                                                       | 10989             | /                        | 53 / 9,9                   | /                             |                          |                      |                                                                                                                                                                                                                                                           |                                                              | 53                           | 9,9                  | IATTTLSKR                                                                                                                                                                                                                                                                                         |                                                                                            |                                 |                      |                                                                                                            |                                                                |
| BRAO285v1_620141 | conserved protein of unknown function, putative SUF system FeS cluster assembly associated domain | 13495             | 54 / 5,6                 | /                          | /                             | 54                       | 5,6                  | LSGEIIA                                                                                                                                                                                                                                                   | Acetyl (N-term)                                              |                              |                      |                                                                                                                                                                                                                                                                                                   |                                                                                            |                                 |                      |                                                                                                            |                                                                |
| BRAO285v1_650005 | conserved protein of unknown function, putative CsbD-like domain                                  | 7066              | 961 / 97,2               | 736 / 97,2<br>181 / 48,6   | 59 / 23,6<br>341 / 79,2       | 961                      | 97,2                 | QGIGEGATGNDR<br>DAVNTAAGAANKNL<br>LQEGEGAVQEVK<br>MDKIKGATNEAVGK<br>GKQQALGDAKQATK<br>QATKDAVNTAAGAANK<br>STMDKIKGATNEAVGK<br>GSTMKIKGATNEAVGK<br>QATKDAVNTAAGAANKNL<br>QGIGEGATGNDRLQEGEGAVQEVK<br>QGIGEGATGNDRLQEGEGAVQEVK<br>AKQIGEGATGNDRLQEGEGAVQEVK | Gln->pyro-Glu (N-term Q)<br>Deamidated (NQ)<br>Oxidation (M) | 736<br>181                   | 97,2<br>48,6         | LQEGEGAVQEVK<br>DAVNTAAGAANKNL<br>LQEGEGAVQEVK<br>QATKDAVNTAAGAANK<br>GSTMKIKGATNEAVGK<br>QATKDAVNTAAGAANKNL<br>QGIGEGATGNDRLQEGEGAVQEVK<br>GKQQALGDAKQATKDAVNTAAGAANK<br>QGIGEGATGNDRLQEGEGAVQEVK<br>AKQIGEGATGNDRLQEGEGAVQEVK<br><br>QATKDAVNTAAGAANK<br>GSTMKIKGATNEAVGK<br>QATKDAVNTAAGAANKNL | Gln->pyro-Glu (N-term Q)<br>Oxidation (M)<br><br>Gln->pyro-Glu (N-term Q)<br>Oxidation (M) | 59<br>341                       | 23,6<br>79,2         | GSTMKIKGATNEAVGK<br>QATKDAVNTAAGAANK<br>GSTMKIKGATNEAVGK<br>QATKDAVNTAAGAANKNL<br>QGIGEGATGNDRLQEGEGAVQEVK | Oxidation (M)<br><br>Gln->pyro-Glu (N-term Q)<br>Oxidation (M) |
| BRAO285v1_680003 | Putative 4-oxalocrotonate tautomerase                                                             | 7471              | 75 / 16,2                | 282 / 66,2<br>68 / 16,2    | 56 / 16,2<br>213 / 58,8       | 75                       | 16,2                 | PEITINMAAGR                                                                                                                                                                                                                                               | Oxidation (M)                                                | 282<br>68                    | 66,2<br>16,2         | PEITINMAAGR<br>PEITINMAAGRTTEEK<br>ALVTHLGVDPPEAVVIQINEAPLTHK<br>DISKALVTHLGVDPPEAVVIQINEAPLTHK<br><br>PEITINMAAGR                                                                                                                                                                                | Oxidation (M)<br><br>Oxidation (M)                                                         | 56<br>213                       | 16,2<br>58,8         | PEITINMAAGR<br>PEITINMAAGR<br>ALVTHLGVDPPEAVVIQINEAPLTHK<br>DISKALVTHLGVDPPEAVVIQINEAPLTHK                 | Oxidation (M)<br><br>Oxidation (M)                             |
| BRAO285v1_70003  | conserved protein of unknown function                                                             | 7015              | /                        | 67 / 19,7                  | /                             |                          |                      |                                                                                                                                                                                                                                                           |                                                              | 67                           | 19,7                 | QGTHTGSPGVCR                                                                                                                                                                                                                                                                                      | Gln->pyro-Glu (N-term Q)                                                                   |                                 |                      |                                                                                                            |                                                                |
| BRAO285v1_710015 | conserved protein of unknown function                                                             | 8193              | /                        | 114 / 41,9                 | /                             |                          |                      |                                                                                                                                                                                                                                                           |                                                              | 114                          | 41,9                 | TTLLEQALQVQR<br>LSADDQNAAGALLDYYK                                                                                                                                                                                                                                                                 |                                                                                            |                                 |                      |                                                                                                            |                                                                |
| BRAO285v1_720027 | conserved protein of unknown function                                                             | 7400              | 50 / 15,9                | /                          | /                             | 50                       | 15,9                 | TAMATPDNVLR                                                                                                                                                                                                                                               | Oxidation (M)                                                |                              |                      |                                                                                                                                                                                                                                                                                                   |                                                                                            |                                 |                      |                                                                                                            |                                                                |
| BRAO285v1_80019  | rpmA 50S ribosomal subunit protein L27                                                            | 9587              | /                        | 55 / 10                    | /                             |                          |                      |                                                                                                                                                                                                                                                           |                                                              | 55                           | 10                   | VIPGNIAR                                                                                                                                                                                                                                                                                          |                                                                                            |                                 |                      |                                                                                                            |                                                                |
| BRAO285v1_860016 | conserved protein of unknown function                                                             | 6431              | 72 / 21,7                | 121 / 53,3                 | 119 / 46,7                    | 72                       | 21,7                 | AEPDDYIDAVGR                                                                                                                                                                                                                                              |                                                              | 121                          | 53,3                 | AEPDDYIDAVGR<br>LVDEFSLADEAPASVFTA                                                                                                                                                                                                                                                                |                                                                                            | 119                             | 46,7                 | AEPDDYIDAVGR<br>ALSPLIEDSWRPAVR                                                                            |                                                                |
| BRAO285v1_920004 | thiS thiamine biosynthesis protein ThiS                                                           | 7043              | 50 / 16,7                | /                          | /                             | 50                       | 16,7                 | AGDEIITPR                                                                                                                                                                                                                                                 |                                                              |                              |                      |                                                                                                                                                                                                                                                                                                   |                                                                                            |                                 |                      |                                                                                                            |                                                                |
| BRAO285v1_930001 | putative ABC transporter, substrate-binding protein                                               | 44067             | 51 / 2,4                 | 57 / 2,4                   | 51 / 2,4                      | 51                       | 2,4                  | ASSPATASRR                                                                                                                                                                                                                                                |                                                              | 57                           | 2,4                  | ASSPATASRR                                                                                                                                                                                                                                                                                        |                                                                                            | 51                              | 2,4                  | ASSPATASRR                                                                                                 | Acetyl (N-term)                                                |
| BRAO285v1_950060 | pufB Light harvesting 1 beta subunit                                                              | 8195              | 51 / 17,1                | /                          | /                             | 51                       | 17,1                 | GGSLGLESEAR                                                                                                                                                                                                                                               |                                                              |                              |                      |                                                                                                                                                                                                                                                                                                   |                                                                                            |                                 |                      |                                                                                                            |                                                                |
| BRAO285v1_950109 | conserved protein of unknown function                                                             | 7161              | /                        | 59 / 20<br>54 / 16,9       | /                             |                          |                      |                                                                                                                                                                                                                                                           |                                                              | 59<br>54                     | 20<br>16,9           | GIVTYQLTSPLR<br>PLTEDAIQVKG                                                                                                                                                                                                                                                                       |                                                                                            |                                 |                      |                                                                                                            |                                                                |
| BRAO285v1_950136 | bfr bacterioferritin (iron storage homoprotein)                                                   | 18953             | /                        | 52 / 11,1                  | /                             |                          |                      |                                                                                                                                                                                                                                                           |                                                              | 52                           | 11,1                 | IGLELYQKHVGGLESEH                                                                                                                                                                                                                                                                                 |                                                                                            |                                 |                      |                                                                                                            |                                                                |
| BRAO285v1_990037 | Putative ABC-type RTX toxin transporter, ATPase and permease components                           | 80711             | 52 / 1,2                 | 52 / 1,2<br>58 / 1,2       | 52 / 1,2<br>52 / 1,2          | 52                       | 1,2                  | ASSPAIRRA                                                                                                                                                                                                                                                 | Acetyl (N-term)                                              | 52<br>58                     | 1,2<br>1,2           | ASSPAIRRA<br>ASSPAIRRA                                                                                                                                                                                                                                                                            | Acetyl (N-term)<br>Acetyl (N-term)                                                         | 52<br>52                        | 1,2<br>1,2           | ASSPAIRRA<br>ASSPAIRRA                                                                                     | Acetyl (N-term)<br>Acetyl (N-term)                             |
| back to table 1  |                                                                                                   |                   |                          |                            |                               |                          |                      |                                                                                                                                                                                                                                                           |                                                              |                              |                      |                                                                                                                                                                                                                                                                                                   |                                                                                            |                                 |                      |                                                                                                            |                                                                |

**Supplemental Table S4** : Accessions and origin of *Aeschynomene* species used in this study.

| Species                        | Accession   | Origin    | Inoculated strain |
|--------------------------------|-------------|-----------|-------------------|
| <i>A. indica</i>               | LSTM n°19   | Senegal   | ORS285            |
| <i>A. evenia ssp.serrulata</i> | PI 572567   | USA       | ORS285            |
| <i>A. evenia ssp. evenia</i>   | PI 225551   | Zambia    | ORS285            |
| <i>A. virginica</i>            | LSTM n°63   | USA       | ORS285            |
| <i>A. scabra</i>               | PI 296044   | Mexique   | ORS285            |
| <i>A. sensitiva</i>            | LSTM n°28   | Senegal   | ORS285            |
| <i>A. afraspera</i>            | LSTM n° 1   | Senegal   | ORS285            |
| <i>A. aspera</i>               | IRRI 013020 | Sri Lanka | ORS285            |
| <i>A. nilotica</i>             | IRRI 014040 | Senegal   | ORS285            |
| <i>A. americana</i>            | PI 544122   | USA       | ORS301            |
| <i>A. pfundii</i>              | LSTM n°54   | Zimbabwe  | ORS302            |
| <i>A. schimperii</i>           | IRRI 012156 | Senegal   | ORS305            |



**Supplemental Table S5:** List of primer pairs used in this study and their utilization. The same primer pair designed for *EFl $\alpha$*  was used for the 3 *Aeschynomene* species.

| Gene                          | Forward primer            | Reverse primer            | Use       |
|-------------------------------|---------------------------|---------------------------|-----------|
| <i>EFl<math>\alpha</math></i> | AATGGTGATGCTGGTATGGTTAAG  | TCTTCTTCTGTGCTGCCTTGG     | RTqPCR    |
| <i>AeDNF1</i>                 | TCTGCTCACCTTCGCCATAACC    | ACCTCGTCATTGCCGTTGGG      | RTqPCR    |
| <i>AeDNF1</i>                 | CACCAGGTCAGATAGCGGTGTAAG  | CAGAATGGTTATGGCGAAGG      | RNAi      |
| <i>AaNCR</i>                  | AAATTATTAGTTAAGATTCTCAC   | ATCAAATGGGCATATACAAATG    | ISH probe |
| <i>AiNCR</i>                  | TTGTCCACAGGAAAACCTTCTATTG | GCTACCGCCACACTCTCC        | ISH probe |
| <i>Aa/AiLegHb</i>             | TGGTGAACCTCATGGAATGTATTG  | GAGATGGACAGAGCCTAAGTG     | ISH probe |
| <i>AaLegHb</i>                | CTCTTGTGGTGAACCTCATGGAATG | AATGGTGGCATGTGTCTTGAG     | RTqPCR    |
| <i>AaNCR1</i>                 | CAATGGCAAGTCATCATCTTCAAG  | ATTTTCATCTAACGGGCACCTTTGG | RTqPCR    |
| <i>AaNCR2</i>                 | ACAAGTCATCATCAAGTGGCAGAG  | CAGGAACAGTCTTCACCATCAGG   | RTqPCR    |
| <i>AaNCR4</i>                 | ACTTATCTTGCTGGTGACAGTTATG | ATTTTCATCTAACGGGCACCTTTGG | RTqPCR    |
| <i>AaNCR6</i>                 | GTATGGGCGGACACGAACTG      | GGACTTGGGATATTGGGAGCAC    | RTqPCR    |
| <i>AiLegHb</i>                | TAGGAGCCACCCATTTCAAATATG  | CCCTTCATCTCTGCTGACCAC     | RTqPCR    |
| <i>AiNCR1</i>                 | CAGACAACATTTGCTACAAAGATG  | AACCCTCGTCAAACCACATATC    | RTqPCR    |
| <i>AiNCR2</i>                 | TTGTCCACAGGAAAACCTTCTATTG | GCTACCGCCACACTCTCC        | RTqPCR    |
| <i>AiNCR3</i>                 | CATCATCAAGTGACTGGCATAACG  | AGCCTAACGCAAACCTCCAAGC    | RTqPCR    |
| <i>AiNCR5</i>                 | GCCTCGGGAAAGTGTAACAA      | TCTCTTGACATTGCCATCA       | RTqPCR    |

## Supplemental material and methods:

Proteins in the range of ~4-9 kDa (indicated with dashed line in Supplemental Figure S2) from free-living bacteria and bacteroid extracts were cut out from Tricine SDS-PAGE gels and destained with 500  $\mu$ L of 25 mM  $\text{NH}_4\text{HCO}_3$  then twice with 50 % acetonitrile in 25 mM  $\text{NH}_4\text{HCO}_3$  before being dried in a vacuum centrifuge system. Fifteen microliters of a trypsin solution (Sequencing Grade Modified Trypsin, Promega, Madison, USA) at a concentration of 0.0125  $\mu\text{g}/\mu\text{L}$  in 25 mM  $\text{NH}_4\text{HCO}_3$ , was added to every gel slice which were kept for 15 min on ice. Ninety microliters of 25 mM  $\text{NH}_4\text{HCO}_3$  were added, and the samples were kept another 15 min at room temperature. Digestion was performed overnight at 37°C then peptides were extracted twice by addition of 100  $\mu\text{L}$  of 80 % acetonitrile in water containing 2 % formic acid. Peptides were then dried in a vacuum centrifuge before being suspended in 10  $\mu\text{L}$  formic acid 2 % for LC-MS/MS analysis.

The protein digests were analyzed using a Q-TOF mass spectrometer (Maxis Impact; Bruker Daltonik GmbH, Bremen, Germany), interfaced with a nano-HPLC U3000 system (Thermo Scientific, Waltham, USA). Samples were concentrated with a pre-column (Thermo Scientific, C18 PepMap100, 300  $\mu\text{m} \times 5 \text{ mm}$ , 5  $\mu\text{m}$ , 100 Å) at a flow rate of 20  $\mu\text{L}/\text{min}$  using 0.1% formic acid. After pre-concentration, peptides were separated with a reversed-phase capillary column (Thermo Scientific, C18 PepMap100, 75  $\mu\text{m} \times 250 \text{ mm}$ , 3  $\mu\text{m}$ , 100 Å) at a flow rate of 0.3  $\mu\text{L}/\text{min}$  using a two steps gradient (8 % to 28 % acetonitrile in 40 min then 28 % to 42 % in 10 min), and eluted directly into the mass spectrometer. Proteins were identified by MS/MS by information-dependent acquisition of fragmentation spectra of multiple charged peptides. MS/MS raw data were analysed using Data Analysis software (Bruker Daltonik GmbH, Bremen, Germany) to generate the peak lists.

Protein identifications were obtained by searching locally with Mascot (v.2.4.0, Matrix Science) against a home-made nucleotide database (215376 sequences). This database was composed of *A. afraspera* and *A. indica* sequences from ESTtik databases ([www.esttik.cirad.fr](http://www.esttik.cirad.fr)). All the NCRs were extracted from these libraries and their signal peptide sequences were manually removed. The following parameters were used: semi-trypsin as enzyme, two missed cleavage sites were allowed, carbamidomethylation of Cysteine as fixed modification and Acetyl (N-term), deamidated (NQ), Gln->pyro-Glu (N-term Q), Glu->pyro-Glu (N-term E), Oxidation (M), Phosphorylation (ST) and Phosphorylation (Y) were allowed as variable modifications. Mass tolerance was set to 30 ppm on full scans and 0.05 Da for fragment ions. Proteins were validated when at least one peptide with a p value <0.05 was identified. In addition, for all protein identified with only one peptide, MS/MS spectra were carefully checked manually for validation.

## Supplemental material and methods:

Proteins in the range of ~4-9 kDa (indicated with dashed line in Supplemental Figure S2) from free-living bacteria and bacteroid extracts were cut out from Tricine SDS-PAGE gels and destained with 500  $\mu$ L of 25 mM  $\text{NH}_4\text{HCO}_3$  then twice with 50 % acetonitrile in 25 mM  $\text{NH}_4\text{HCO}_3$  before being dried in a vacuum centrifuge system. Fifteen microliters of a trypsin solution (Sequencing Grade Modified Trypsin, Promega, Madison, USA) at a concentration of 0.0125  $\mu\text{g}/\mu\text{L}$  in 25 mM  $\text{NH}_4\text{HCO}_3$ , was added to every gel slice which were kept for 15 min on ice. Ninety microliters of 25 mM  $\text{NH}_4\text{HCO}_3$  were added, and the samples were kept another 15 min at room temperature. Digestion was performed overnight at 37°C then peptides were extracted twice by addition of 100  $\mu\text{L}$  of 80 % acetonitrile in water containing 2 % formic acid. Peptides were then dried in a vacuum centrifuge before being suspended in 10  $\mu\text{L}$  formic acid 2 % for LC-MS/MS analysis.

The protein digests were analyzed using a Q-TOF mass spectrometer (Maxis Impact; Bruker Daltonik GmbH, Bremen, Germany), interfaced with a nano-HPLC U3000 system (Thermo Scientific, Waltham, USA). Samples were concentrated with a pre-column (Thermo Scientific, C18 PepMap100, 300  $\mu\text{m} \times 5 \text{ mm}$ , 5  $\mu\text{m}$ , 100  $\text{\AA}$ ) at a flow rate of 20  $\mu\text{L}/\text{min}$  using 0.1% formic acid. After pre-concentration, peptides were separated with a reversed-phase capillary column (Thermo Scientific, C18 PepMap100, 75  $\mu\text{m} \times 250 \text{ mm}$ , 3  $\mu\text{m}$ , 100  $\text{\AA}$ ) at a flow rate of 0.3  $\mu\text{L}/\text{min}$  using a two steps gradient (8 % to 28 % acetonitrile in 40 min then 28 % to 42 % in 10 min), and eluted directly into the mass spectrometer. Proteins were identified by MS/MS by information-dependent acquisition of fragmentation spectra of multiple charged peptides. MS/MS raw data were analysed using Data Analysis software (Bruker Daltonik GmbH, Bremen, Germany) to generate the peak lists.

Protein identifications were obtained by searching locally with Mascot (v.2.4.0, Matrix Science) against a home-made nucleotide database (215376 sequences). This database was composed of *A. afraspera* and *A. indica* sequences from ESTtik databases ([www.esttik.cirad.fr](http://www.esttik.cirad.fr)). All the NCRs were extracted from these libraries and their signal peptide sequences were manually removed. The following parameters were used: semi-trypsin as enzyme, two missed cleavage sites were allowed, carbamidomethylation of Cysteine as fixed modification and Acetyl (N-term), deamidated (NQ), Gln->pyro-Glu (N-term Q), Glu->pyro-Glu (N-term E), Oxidation (M), Phosphorylation (ST) and Phosphorylation (Y) were allowed as variable modifications. Mass tolerance was set to 30 ppm on full scans and 0.05 Da for fragment ions. Proteins were validated when at least one peptide with a p value <0.05 was identified. In addition, for all protein identified with only one peptide, MS/MS spectra were carefully checked manually for validation.
